# Supplementary material for: Chloroquinoline–acetamide hybrids: a promising series of potential antiprotozoal agents
Source: Royal Society of Chemistry journal article supplement (doi:10.1039/c5ra05472a), 2015-01-01
Supplement: c5ra05472a1.pdf [file c5ra05472a1.pdf]

### Supplementary Information

## Chloroquinoline-acetamide hybrids: A promising series of potential antiprotozoal agent

Afreen Inam, Robyn L. Van Zyl, Natasha J. van Vuuren, Chien-Teng Chen, Fernando Avecilla, Subhash M. Agarwal, Amir Azam

**Table-** Bond lengths [ $\text{\AA}$ ] and angles [ $^\circ$ ] for 2-(4-(7-chloroquinolin-4-yl)piperazine-1-yl)-*N*-(4-fluorophenyl)acetamide (**A7**), for 2-(4-(7-chloroquinolin-4-yl)piperazine-1-yl)-*N-p*-tolylacetamide (**A8**), for 2-(4-(7-chloroquinolin-4-yl)piperazine-1-yl)-*N-o*-tolylacetamide (**A12**) and 2-(4-(7-chloroquinolin-4-yl)piperazine-1-yl)-1-(4-(2,3-dichlorophenyl)pipezin-1-yl)-ethanone (**A21**).

| Bond lengths | <b>A7</b>  | <b>A8</b>  | <b>A12</b> | <b>A21</b> |
|--------------|------------|------------|------------|------------|
| Cl(1)-C(1)   | 1.7373(11) | 1.7404(14) | 1.7380(12) | 1.7369(11) |
| Cl(2)-C(15)  |            |            |            | 1.7257(11) |
| Cl(3)-C(16)  |            |            |            | 1.7337(12) |
| F(1)-C(13)   | 1.3659(14) |            |            |            |
| O(1)-C(9)    | 1.2212(14) | 1.2160(17) | 1.2207(15) | 1.2255(13) |
| N(1)-C(5)    | 1.3994(14) | 1.4006(18) | 1.4090(14) | 1.4054(13) |
| N(1)-C(6)    | 1.4613(14) | 1.4732(18) | 1.4605(15) | 1.4655(13) |
| N(1)-C(21)   |            |            |            | 1.4748(13) |
| N(1)-C(17)   | 1.4751(14) | 1.4589(18) | 1.4696(15) |            |
| N(2)-C(8)    | 1.4539(15) | 1.4636(18) | 1.4564(15) | 1.4585(13) |
| N(2)-C(7)    | 1.4670(15) | 1.4638(18) | 1.4588(16) | 1.4574(14) |

|            |            |            |            |            |
|------------|------------|------------|------------|------------|
| N(2)-C(16) | 1.4674(14) | 1.4702(18) | 1.4625(16) |            |
| N(2)-C(20) |            |            |            | 1.4650(13) |

---

| Angles          | <b>A7</b> | <b>A8</b>  | <b>A12</b> | <b>A21</b> |
|-----------------|-----------|------------|------------|------------|
| C(5)-N(1)-C(6)  | 115.86(9) | 117.11(11) | 115.12(10) | 115.10(8)  |
| C(5)-N(1)-C(21) |           |            |            | 116.43(8)  |
| C(6)-N(1)-C(21) |           |            |            | 109.97(8)  |
| C(5)-N(1)-C(17) | 114.69(9) | 116.95(11) | 114.39(9)  |            |
| C(6)-N(1)-C(17) | 109.46(9) | 110.01(11) | 110.54(9)  |            |
| C(8)-N(2)-C(7)  | 111.16(9) | 110.38(11) | 112.00(10) | 110.73(8)  |
| C(7)-N(2)-C(20) |           |            |            | 109.43(8)  |
| C(8)-N(2)-C(20) |           |            |            | 112.45(9)  |
| C(8)-N(2)-C(16) | 110.26(9) | 110.11(11) | 111.66(10) |            |
| C(7)-N(2)-C(16) | 109.03(9) | 108.47(11) | 109.72(10) |            |

---

**Table -** Hydrogen bonds for the compounds 2-(4-(7-chloroquinolin-4-yl)piperazine-1-yl)-*N*-(4-fluorophenyl)acetamide (**A7**), 2-(4-(7-chloroquinolin-4-yl)piperazine-1-yl)-*N*-*p*-tolylacetamide (**A8**) and 2-(4-(7-chloroquinolin-4-yl)piperazine-1-yl)-*N*-*o*-tolylacetamide (**A12**) [ $\text{\AA}$  and  $^\circ$ ].

### A7

---

| D-H...A               | d(D-H)   | d(H...A)  | d(D...A)   | <(DHA)    |
|-----------------------|----------|-----------|------------|-----------|
| O(1W)-H(1WA)...N(4)#1 | 0.831(9) | 2.080(10) | 2.8965(13) | 167.5(16) |
| O(1W)-H(1WB)...N(2)   | 0.824(9) | 2.137(9)  | 2.9461(13) | 167.3(15) |
| N(3)-H(3)...O(1W)#2   | 0.86     | 2.03      | 2.8740(13) | 165.1     |

---

Symmetry transformations used to generate equivalent atoms:

#1  $x+1, y+1, z$  #2  $x+1, y, z$

### A8

---

| D-H...A           | d(D-H)    | d(H...A)  | d(D...A)   | <(DHA)    |
|-------------------|-----------|-----------|------------|-----------|
| N(3)-H(3N)...N(2) | 0.870(18) | 2.248(17) | 2.7186(17) | 113.8(14) |

---

---

**A12**

---

| D-H...A           | d(D-H)    | d(H...A)  | d(D...A)   | <(DHA)    |
|-------------------|-----------|-----------|------------|-----------|
| N(3)-H(3N)...N(2) | 0.815(17) | 2.165(17) | 2.6662(15) | 119.8(14) |

---

**Spectral data of the different substituted chloro acetamides (1-27)**

**2-chloro-N-phenylacetamide (1):** Yield 75%, White solid, <sup>1</sup>HNMR (300MHz, CDCl<sub>3</sub>) δ(ppm): 8.22 (s, 1H), 7.56 (d, 2H, *J* = 8.1Hz), 7.39-7.34 (m, 2H), 7.21-7.16 (m, 1H), 4.20 (s, 2H) [24]

**Methyl 2-(2-chloroacetamido) benzoate (2):** Yield 72%, White solid, <sup>1</sup>HNMR (300MHz, CDCl<sub>3</sub>) δ(ppm): 11.91 (s, 1H) 8.74 (d, 1H, *J* = 8.1Hz), 8.11 (d, 1H, *J* = 6.6Hz), 7.62-7.574 (m, 1H), 7.21-7.16 (m, 1H), 4.24 (s, 2H) 1.74 (s, 3H) [25]

**2-chloro-N-(2, 4-difluorophenyl) acetamide (3):** Yield 70%, White solid, <sup>1</sup>HNMR (300MHz, CDCl<sub>3</sub>) δ(ppm): 9.36 (s, 1H), 8.54 (m, 2H), 7.99 (s, 1H), 4.11 (s, 2H) [24].

**N-(3-acetylphenyl)-2-chloroacetamide (4):** Yield 71%, White solid, <sup>1</sup>HNMR (300MHz, CDCl<sub>3</sub>) δ(ppm): 8.40 (s, 1H), 8.06 (s, 1H), 7.95 (d, 1H, *J* = 8.1 Hz), 7.79 (d, 1H, *J* = 7.8 Hz), 7.52 (t, 1H, *J* = 7.8 Hz), 4.23 (s, 2H), 2.63 (s, 3H) [26].

**N-(4-acetylphenyl)-2-chloroacetamide (5):** Yield 73%, Yellow solid, <sup>1</sup>HNMR (300MHz, CDCl<sub>3</sub>) δ(ppm): 8.40 (s, 1H), 7.99-7.95 (m, 2H), 7.69 (d, 2H, *J* = 8.7 Hz), 4.22 (s, 2H), 2.59 (s, 3H) [27].

**2-chloro-N-(2-fluorophenyl)acetamide (6):** Yield 78%, White solid, <sup>1</sup>HNMR (300MHz, CDCl<sub>3</sub>) δ(ppm): 8.55 (s, 1H), 8.33-8.27 (m, 1H), 7.24-7.12 (m, 3H), 4.24 (s, 2H) [28]

**2-chloro-N-(4-fluorophenyl)acetamide (7):** Yield 80%, White solid, <sup>1</sup>HNMR (300MHz, CDCl<sub>3</sub>) δ(ppm): 8.24 (s, 1H), 7.56-7.51 (m, 2H), 7.11-7.05 (m, 2H), 4.34 (s, 2H). [28]

**2-chloro-N-*p*-tolylacetamide (8):** Yield 82%, White solid, <sup>1</sup>HNMR (300MHz, CDCl<sub>3</sub>) δ(ppm): 8.19 (s, 1H), 7.46 (d, 2H, *J* = 8.4 Hz), 7.19 (d, 2H, *J* = 8.4 Hz), 4.20 (s, 2H), 2.35 (s, 3H) [28].

**2-chloro-N-*m*-tolylacetamide (9):** Yield 84%, yellow solid, <sup>1</sup>HNMR (300MHz, CDCl<sub>3</sub>) δ(ppm): 8.20 (s, 1H), 7.40 (s, 1H), 7.37 (d, 1H, *J* = 8.1 Hz), 7.28-7.24 (m, 1H), 7.02 (d, 1H, *J* = 7.2 Hz), 4.20 (s, 2H), 2.38 (s, 3H) [29]

**2-chloro-N-(3-chlorophenyl)acetamide (10):** Yield 77%, colourless solid, <sup>1</sup>HNMR (300MHz, CDCl<sub>3</sub>) δ(ppm): 8.27 (s, 1H), 7.70 (s, 1H), 7.44 (d, 1H, *J* = 6.9 Hz), 7.34-7.28 (m, 1H), 7.19-7.17 (m, 1H), 4.21 (s, 2H). [28]

**2-chloro-N-(4-bromophenyl)acetamide (11):** Yield 65%, brown solid, <sup>1</sup>HNMR (300MHz, CDCl<sub>3</sub>) δ(ppm): 9.27 (s, 1H), 6.91-6.88 (m, 2H), 6.76 (d, 2H, *J* = 8.4 Hz), 3.48 (s, 2H). [28]

**2-chloro-N-*o*-tolylacetamide (12):** Yield 79%, White solid, <sup>1</sup>HNMR (300MHz, CDCl<sub>3</sub>) δ(ppm): 8.26 (s, 1H), 7.90 (d, 1H, *J* = 7.8 Hz), 7.28-7.32 (m, 2H), 7.14 (d, 1H, *J* = 7.2 Hz), 4.28 (s, 2H), 3.32 (s, 3H). [29]

**2-chloro-N-(naphthalene-1-yl)acetamide (13):** Yield 76%, Brown solid, <sup>1</sup>HNMR (300MHz, CDCl<sub>3</sub>) δ(ppm): 8.80 (s, 1H), 8.02 (d, 1H, *J* = 7.5 Hz), 7.93 (t, 2H, *J* = 8.1 Hz), 7.79 (d, 1H, *J* = 8.1 Hz), 7.63-7.54 (m, 3H), 4.37 (s, 2H). [30] (300MHz, CDCl<sub>3</sub>) δ(ppm): 7.87 (s, 1H), 7.19-7.11 (m, 3H), 4.28 (s, 2H), 2.26 (s, 6H) [31].

**2-chloro-N-(3-chloro,4-fluorophenyl)acetamide (15):** Yield 72%, White solid, <sup>1</sup>HNMR (300MHz, CDCl<sub>3</sub>) δ(ppm): 8.24 ( s, 1H ), 7.77-7.74 (m, 1H ), 7.43-7.37 (m, 1H ), 7.28 ( s, 1H ), 4.21 (m, 2H ) [31].

**1-(4-benzylpiperazin-1-yl)-2-chloroethanone (16):** Yield 55%, Colourless solid, <sup>1</sup>HNMR (300MHz, CDCl<sub>3</sub>) δ(ppm): 7.28-7.15 (m, 2H ), 7.09-6.99 (m, 3H ), 4.01 ( s, 2H ), 3.99-3.85 (m, 4H ), 3.83 ( s, 2H ), 3.65-3.59 (m, 4H ) [32]

**2-chloro-1-(4-(3-chlorophenyl)piperazin-1-yl)ethanone (17):** Yield 42%, White solid, <sup>1</sup>HNMR (300MHz, CDCl<sub>3</sub>) δ(ppm): 7.19 ( s, 1H ), 7.15 (t, 1H, *J* = 8.1Hz ), 6.82 (d, 1H, *J* = 8.4Hz), 6.75 (d, 1H, *J* = 7.8Hz ), 4.04 ( s, 2H ), 3.79-3.66 (m, 4H ), 3.17-3.12 (m, 4H ) [33]

**1-(4-tert-butylpiperazin-1-yl)-2-chloroethanone (18):** Yield 69%, White solid, <sup>1</sup>HNMR (300MHz, CDCl<sub>3</sub>) δ (ppm): 4.02 ( s, 2H ), 3.52-3.43 (m, 4H ), 3.39-3.30 (m, 4H ), 1.40 ( s, 9H ) [34].

**1-(4-(benzo[1,3]dioxol-5-ylmethyl)piperazine-1-yl)-2-chloroethanone (19):** Yield 52%, Off white solid, <sup>1</sup>HNMR (300MHz, CDCl<sub>3</sub>) δ(ppm): 6.86 ( s, 1H ), 6.75 ( s, 2H ), 5.95 ( s, 2H ), 4.06 ( s, 2H ), 3.64 ( s, 2H ), 3.52 ( s, 2H ), 3.45 ( s, 2H ), 2.47-2.45 (m, 4H ), <sup>13</sup>C NMR (CDCl<sub>3</sub>) δppm: 164.94, 147.80, 109.83, 108.08, 107.60, 101.14, 61.49, 46.06, 45.36, 41.58; Anal. Calc. for.C<sub>14</sub>H<sub>17</sub>ClN<sub>2</sub>O<sub>3</sub>: C 56.66, H 5.77, N 9.44; found C 56.93, H 5.65, N 9.40.

**2-chloro-1-(4-phenylpiperazin-1-yl)ethanone (20):** Yield 55%, Off white solid, <sup>1</sup>HNMR (300MHz, CDCl<sub>3</sub>) δ(ppm): 7.95-7.82 (m, 2H ), 7.43-7.33 (m, 2H ), 6.98 (m, 1H ), 4.02 ( s, 2H ), 3.95-3.82 (m, 4H ), 3.35-3.24 (m, 4H ) [35].

**2-chloro-1-(4-(2,3-dichlorophenyl)piperazine-1-yl)ethanone (21):** Yield 55%, Brown solid, <sup>1</sup>HNMR (300MHz, CDCl<sub>3</sub>) δ(ppm): 7.28-7.13 (m, 2H ), 6.95-6.93 (m, 1H ), 4.12 ( s,

2H ), 3.82-3.81 (m, 2H ), 3.72-3.71 (m, 2H ), 3.10-3.03 (m, 4H );  $^{13}\text{C}$  NMR ( $\text{CDCl}_3$ )  $\delta$ (ppm): 164.08, 144.77, 129.44, 123.00, 122.89, 120.62, 114.12, 46.70, 46.16, 41.85; Anal. Calc. for  $\text{C}_{12}\text{H}_{13}\text{Cl}_3\text{N}_2\text{O}$ ; C 49.86, H 4.26, N 9.11, found C 49.66, H 4.06, N 9.21.

**2-chloro-N-(4-hydroxypiperidin-1-yl)acetamide (22):** Yield 55%, Dirty green Solid,  $^1\text{H}$ NMR (300MHz,  $\text{CDCl}_3$ )  $\delta$ (ppm): 5.24 (s, 1H ), 5.14-5.11 (m, 1H ), 4.11-4.01 (m, 4H), 3.83-3.72 (m, 2H ), 2.01-1.77 (m, 4H ) [36].

**2-chloro-N-cyclohexylacetamide (23):** Yield 82%, Colourless solid,  $^1\text{H}$ NMR (300MHz,  $\text{CDCl}_3$ )  $\delta$ (ppm): 6.45 (s, 1H ), 4.04 (s, 2H ), 3.86-3.75 (m, 1H ), 1.96-1.92 (m, 2H ), 1.78-1.62 (m, 4H ), 1.47-1.34 (m, 2H ), 1.28-1.15 (m, 2H ) [30].

**2-chloro-N-isopropylacetamide (24):** Yield 75%, solid,  $^1\text{H}$ NMR (300MHz,  $\text{CDCl}_3$ )  $\delta$ (ppm): 6.41 (s, 1H ), 4.28-4.09 (m, 1H ), 4.03 (s, 2H ), 1.22 (s, 6H ) [38]

**2-chloro-N-cyclopropylacetamide (25):** Yield 70%, Colourless Solid,  $^1\text{H}$ NMR (300MHz,  $\text{CDCl}_3$ )  $\delta$ (ppm) 12.07 (s, 1H ), 3.61 (s, 2H ), 1.87-1.65 (m, 1H ), 1.45-1.40 (m, 4H ) [39].

**2-chloro-N-cyclopentylacetamide (26):** Yield 78%, Colourless Solid,  $^1\text{H}$ NMR (300MHz,  $\text{CDCl}_3$ )  $\delta$ (ppm): 6.52 (s, 1H ), 4.27-4.17 (m, 1H ), 4.01 (s, 2H ), 2.03-1.97 (m, 2H ), 1.73-1.56 (m, 4H ), 1.46-1.40 (m, 2H ) [40].

**N-butyl-2-chloroacetamide (27):** Yield 74%, White solid,  $^1\text{H}$ NMR (300MHz,  $\text{CDCl}_3$ )  $\delta$ (ppm): 7.35 (s, 1H ), 3.45-3.34 (m, 2H ), 3.19 (s, 2H ), 2.14-2.05 (m, 2H ), 2.04-1.99 (m, 2H ), 1.21-1.11 (m, 3H ) [40].

# <sup>1</sup>H Spectra of the new compounds

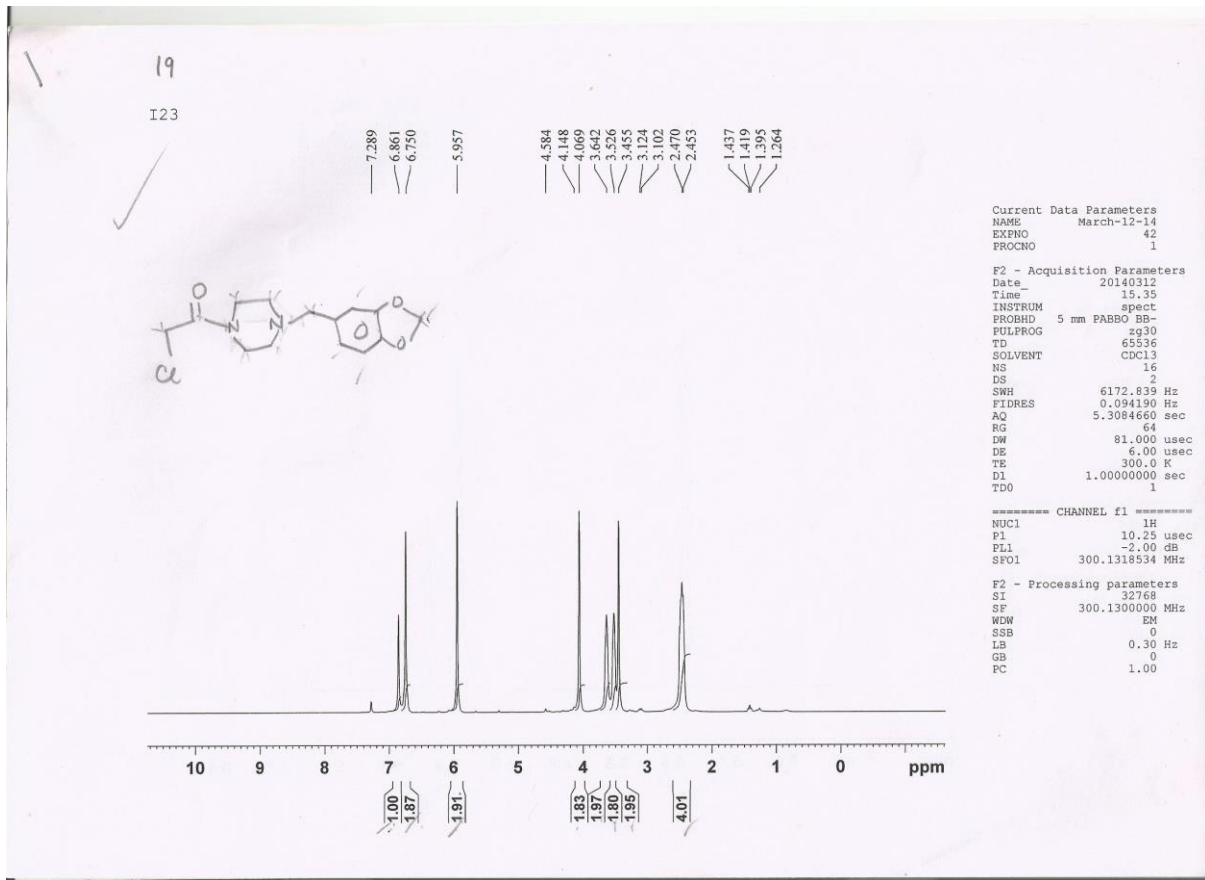

Figure1: <sup>1</sup>H Spectra of the compound 19



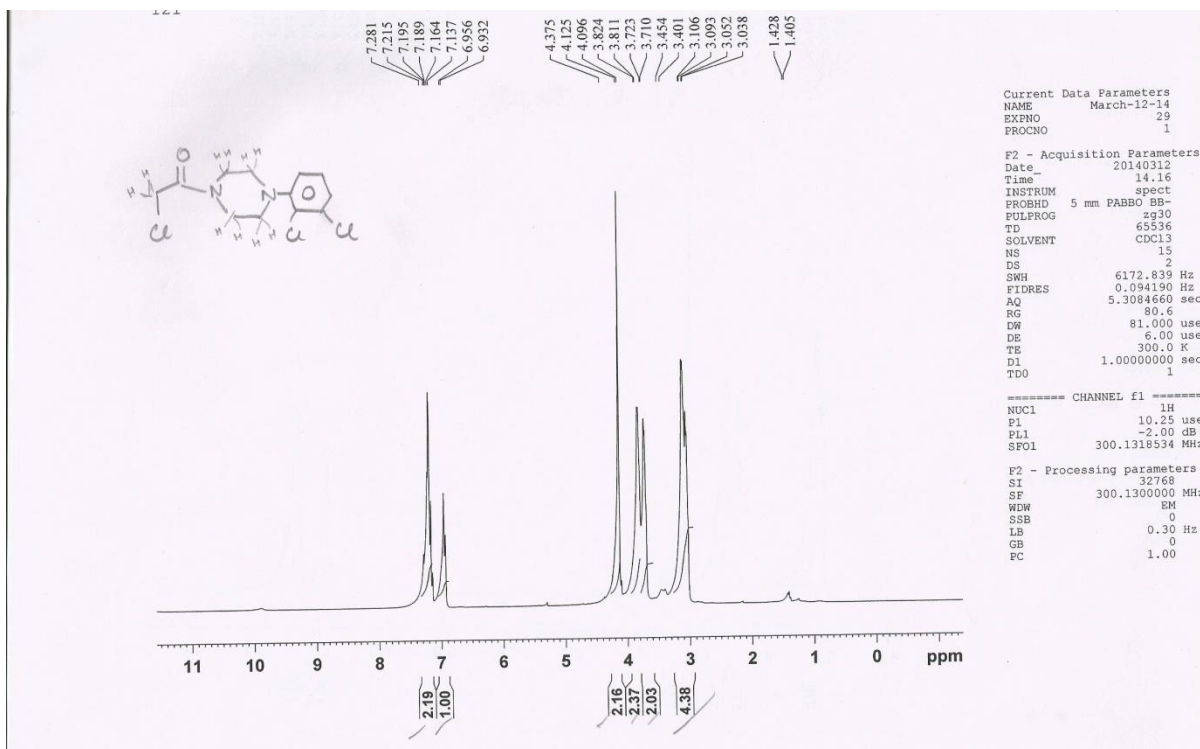

Figure2: <sup>1</sup>H Spectra of the compound 21

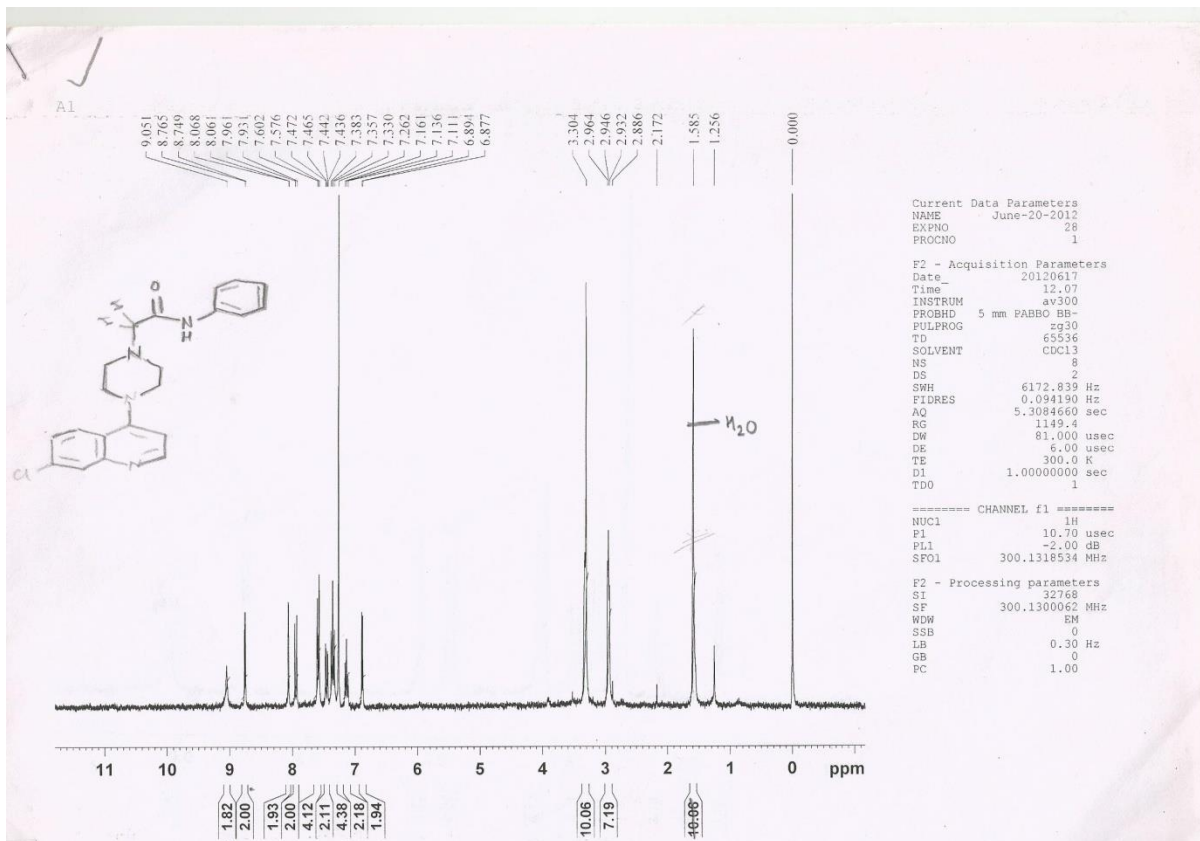

Figure3: <sup>1</sup>H Spectra of the compound A1

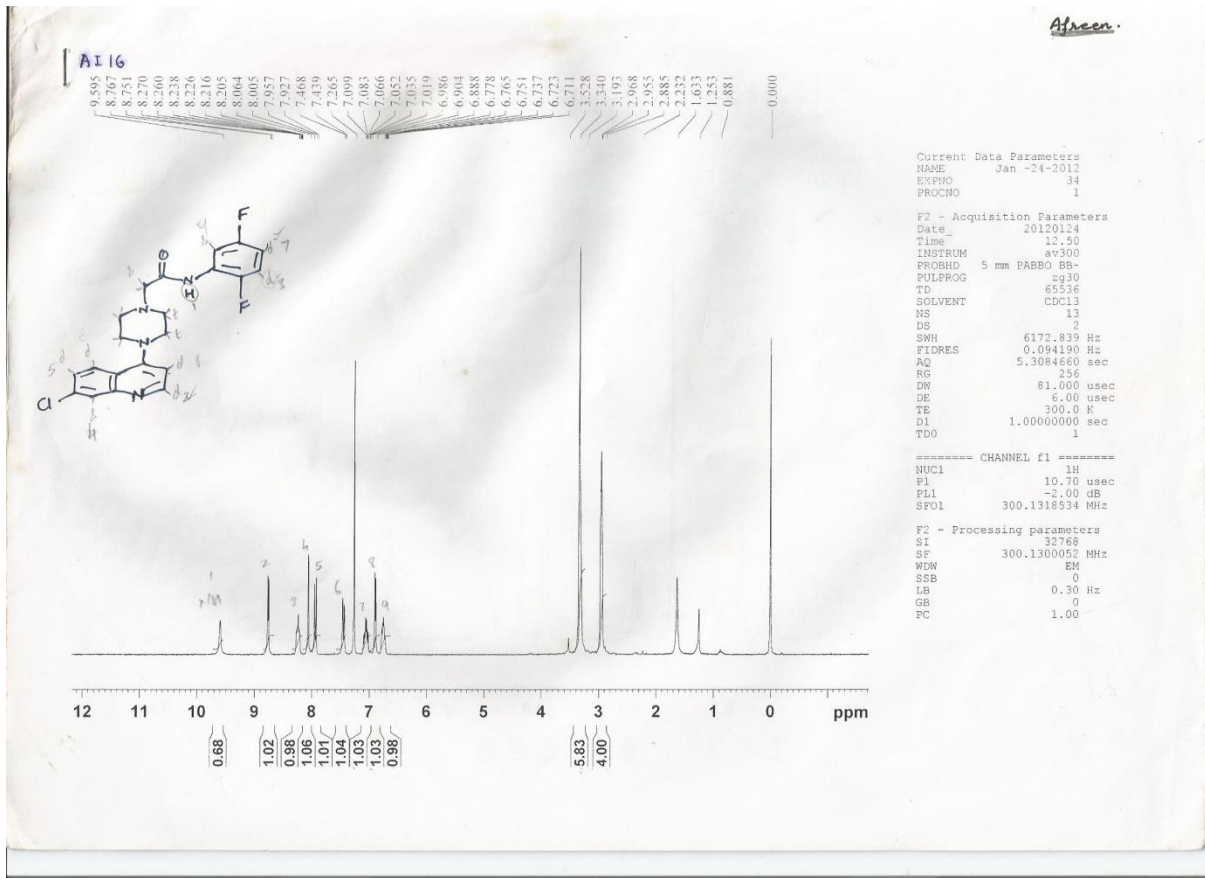

**Figure4:  $^1\text{H}$  Spectra of the compound A3**

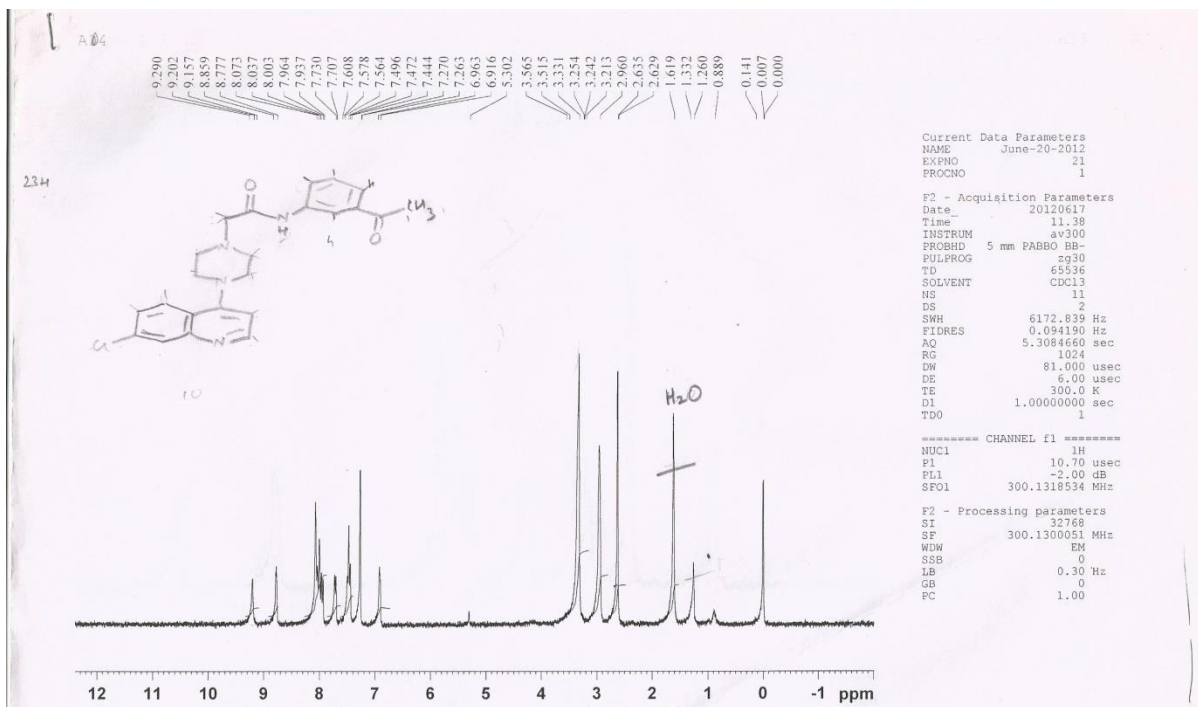

Figure5: <sup>1</sup>H Spectra of the compound A4

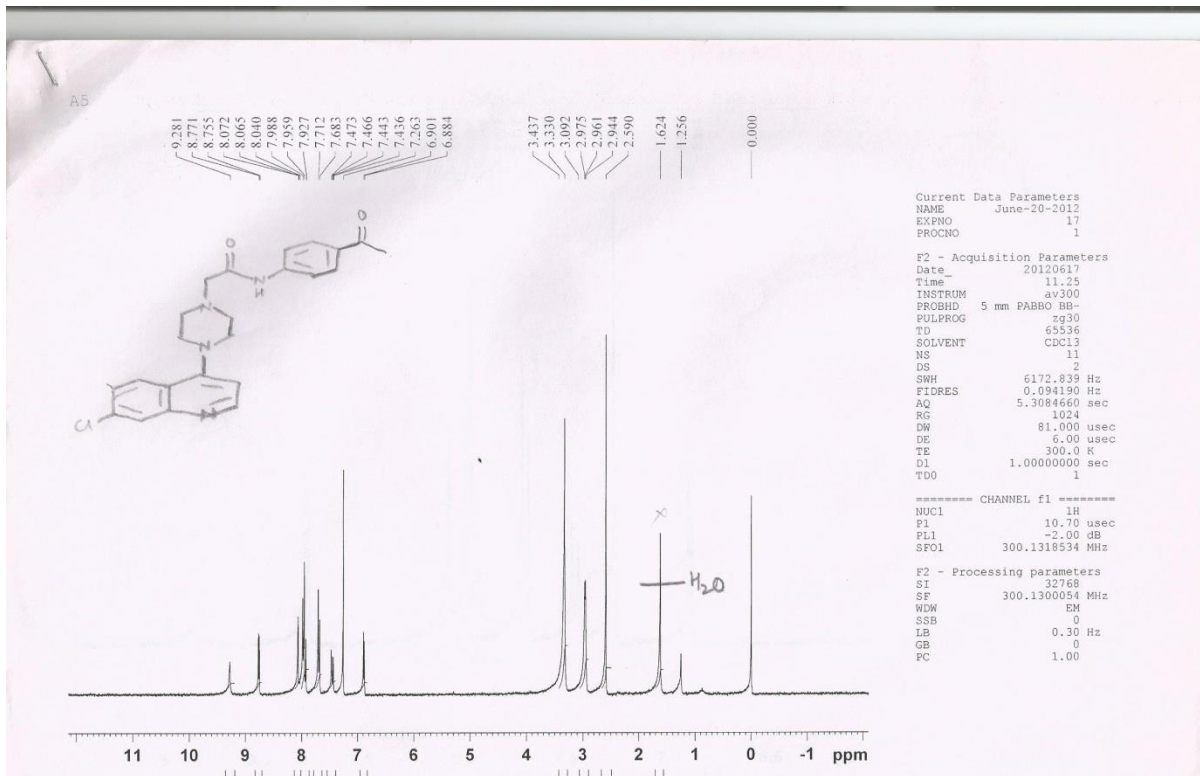

Figure6:  $^1\text{H}$  Spectra of the compound A5

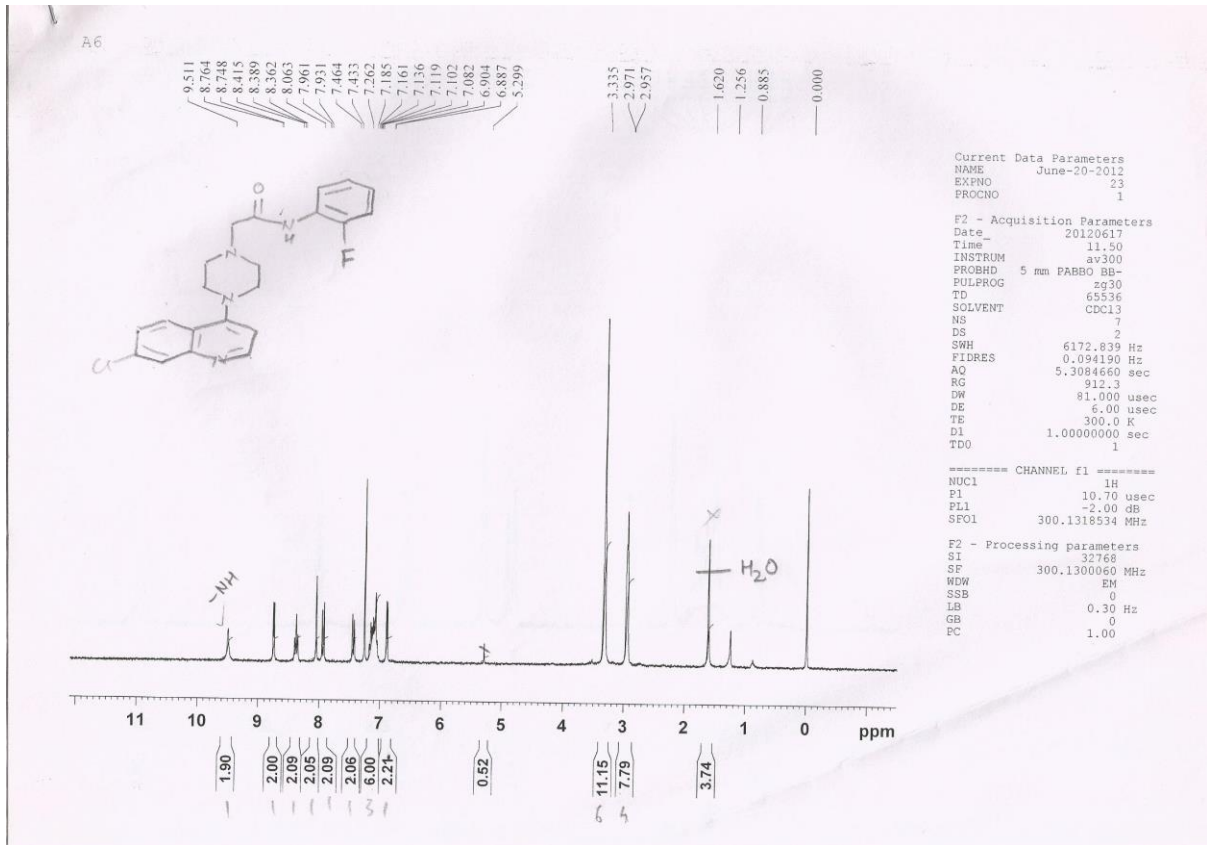

Figure7:  $^1\text{H}$  Spectra of the compound A6

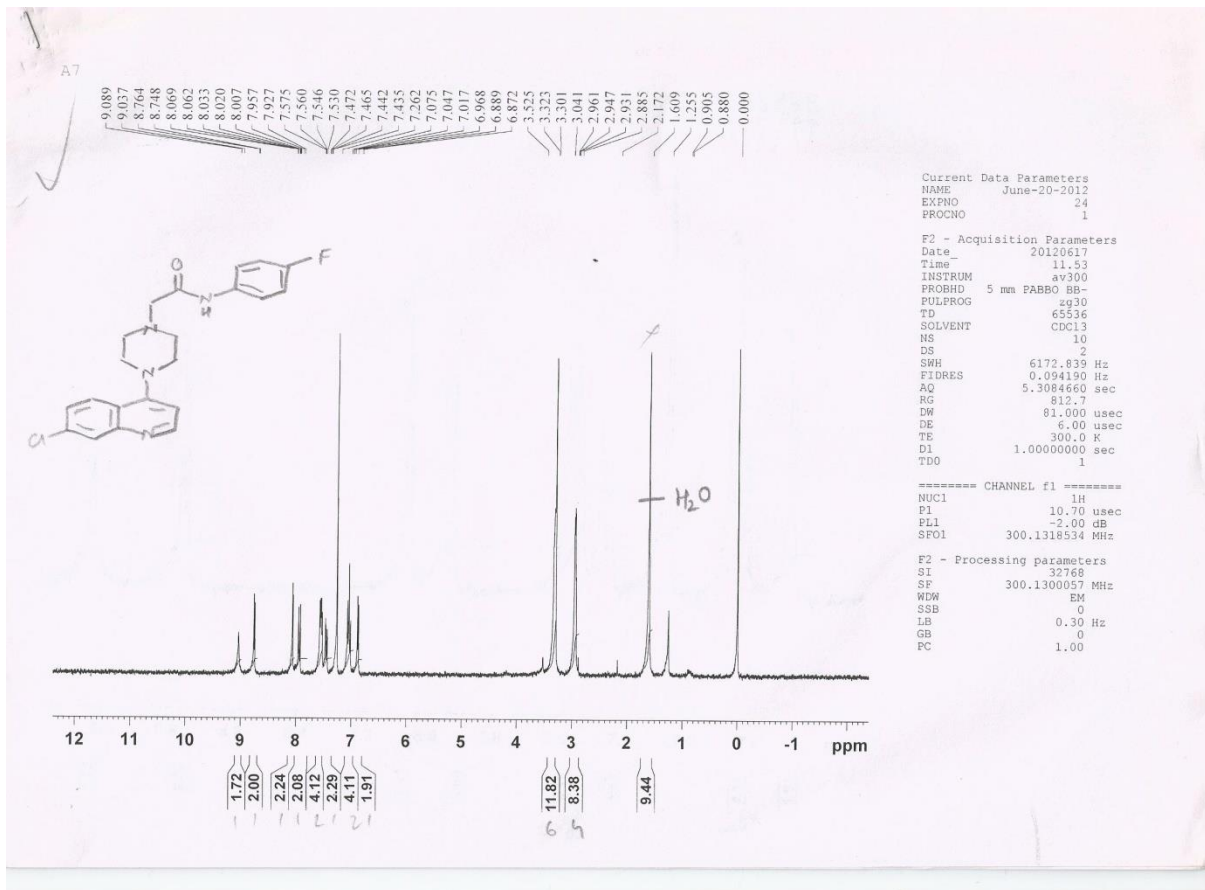

Figure8: <sup>1</sup>H Spectra of the compound A7

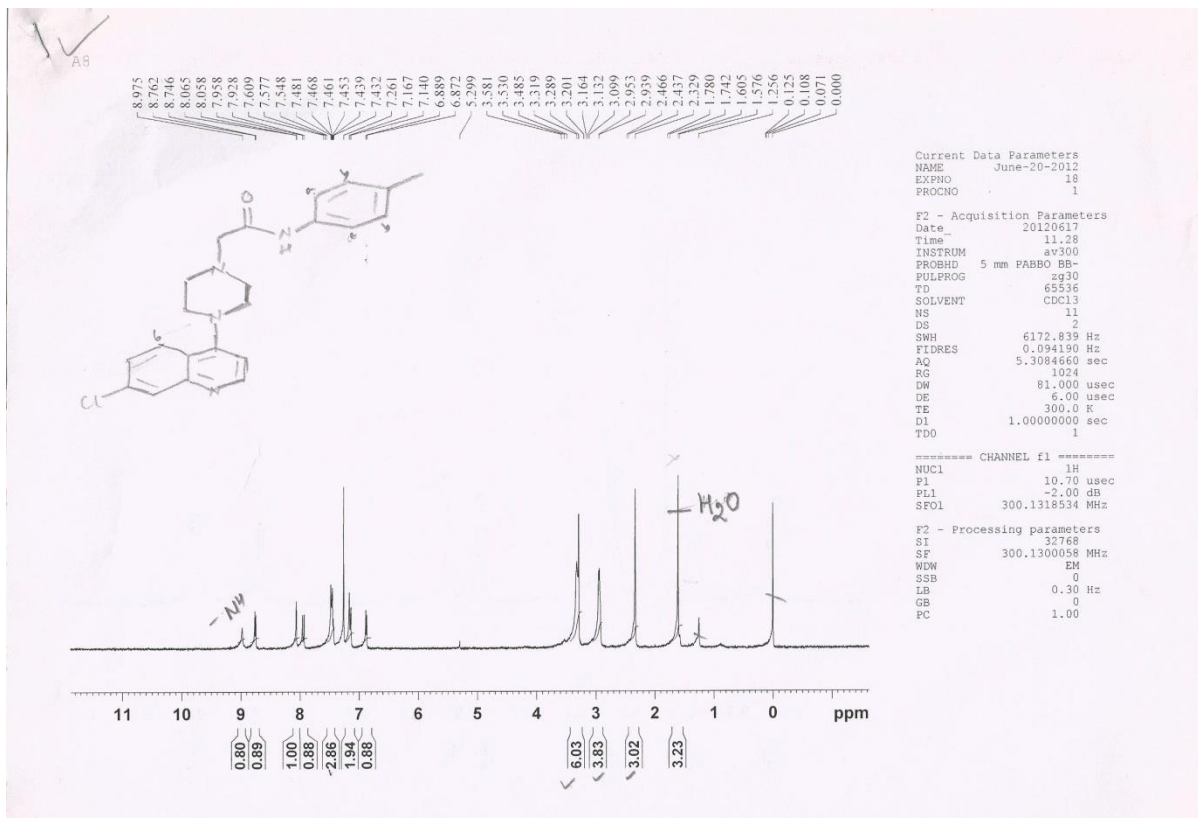

Figure9: <sup>1</sup>H Spectra of the compound A8



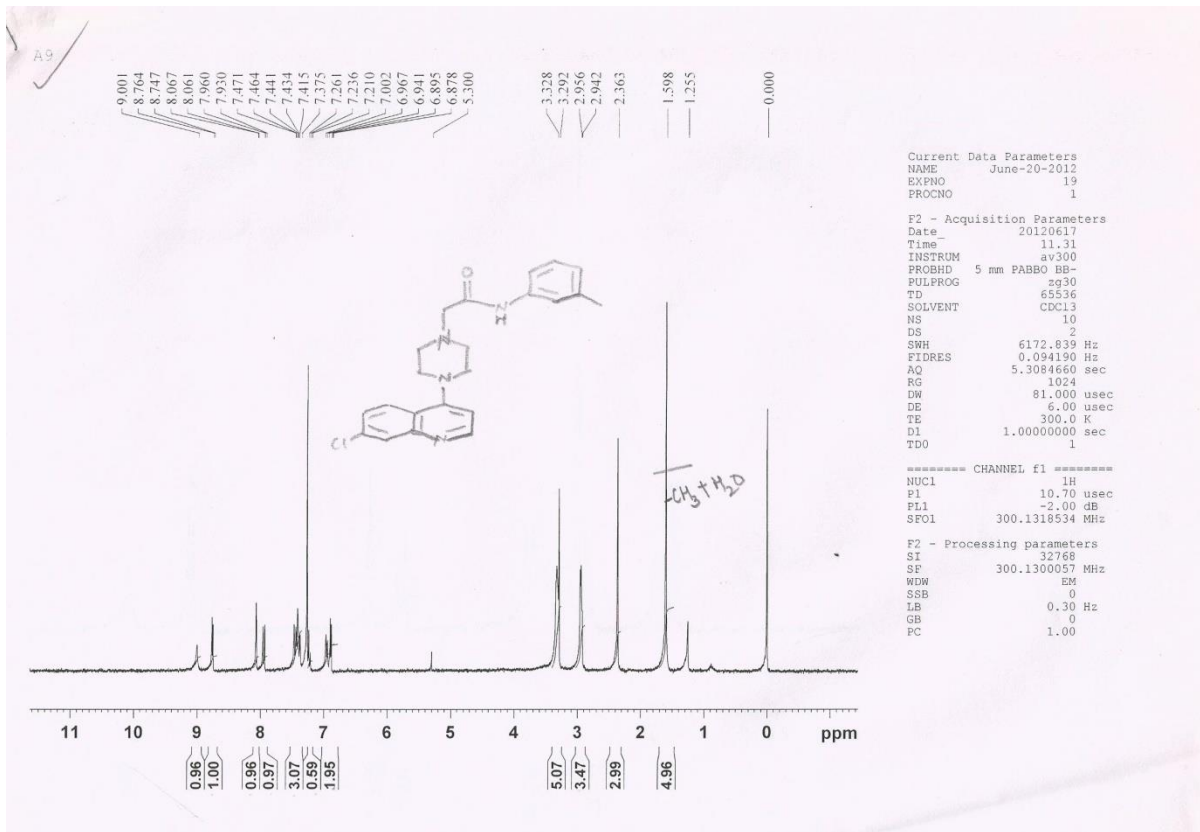

Figure10: <sup>1</sup>H Spectra of the compound A9

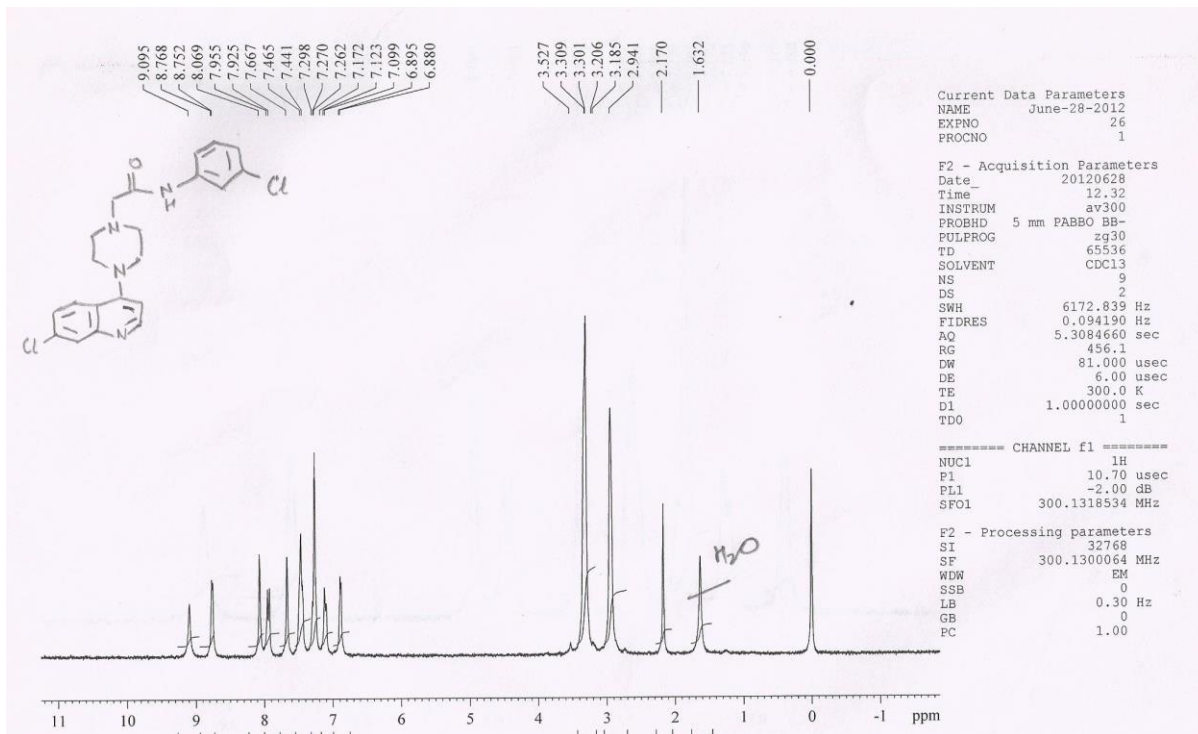

Figure11:  $^1\text{H}$  Spectra of the compound A10

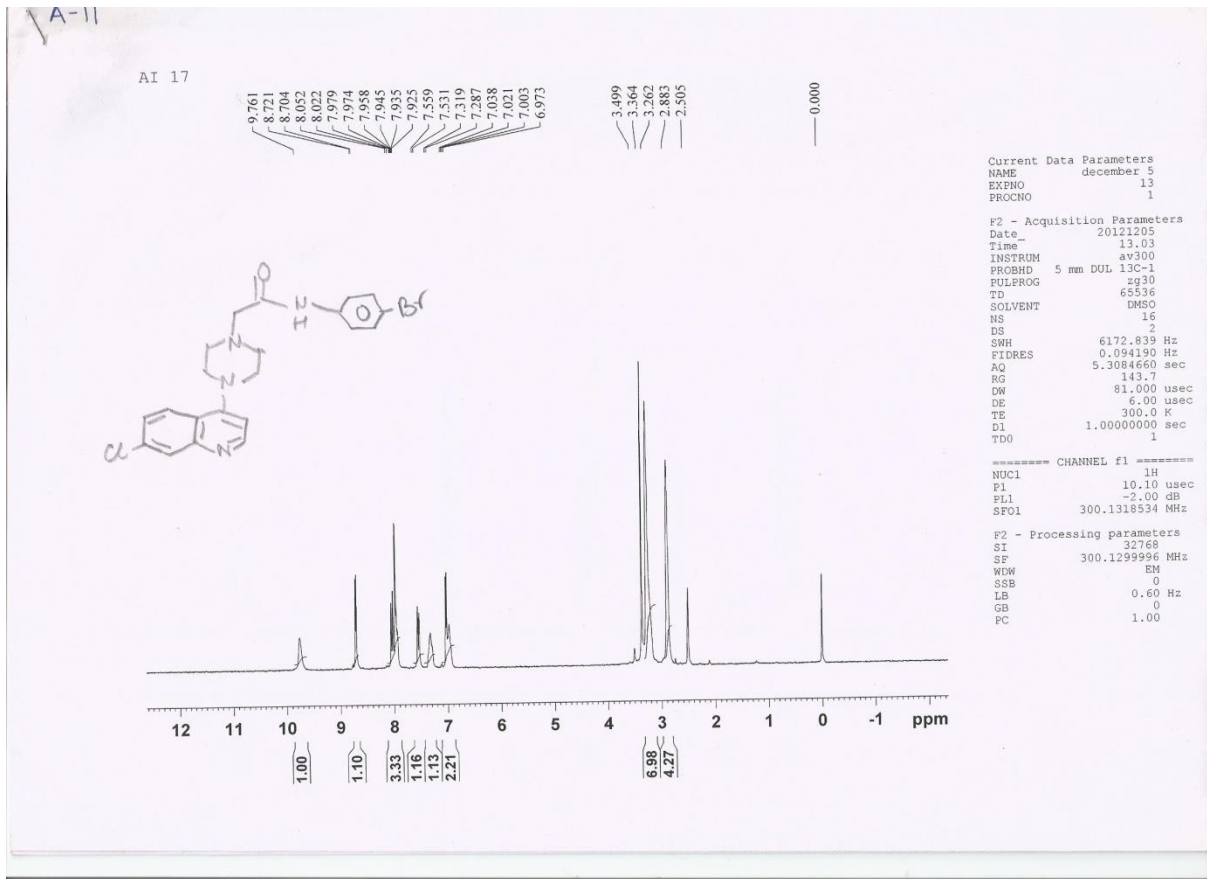

Figure12: <sup>1</sup>H Spectra of the compound A11

12

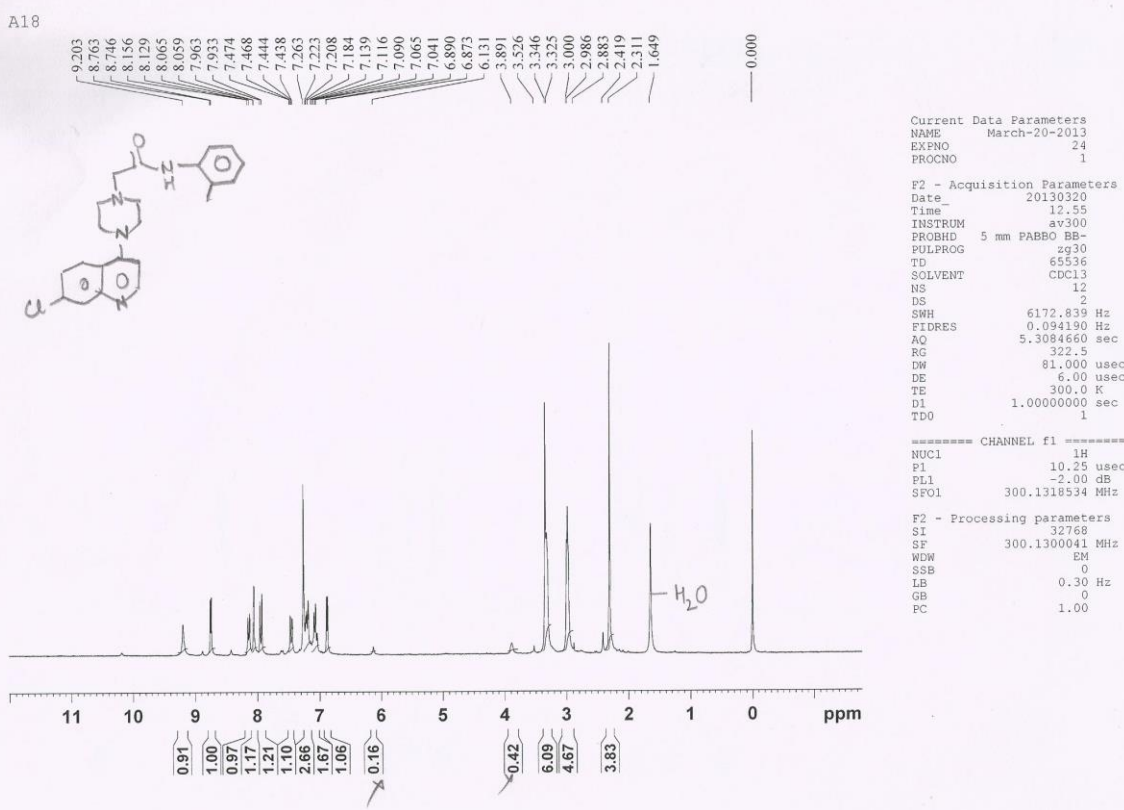

Figure13: <sup>1</sup>H Spectra of the compound A12

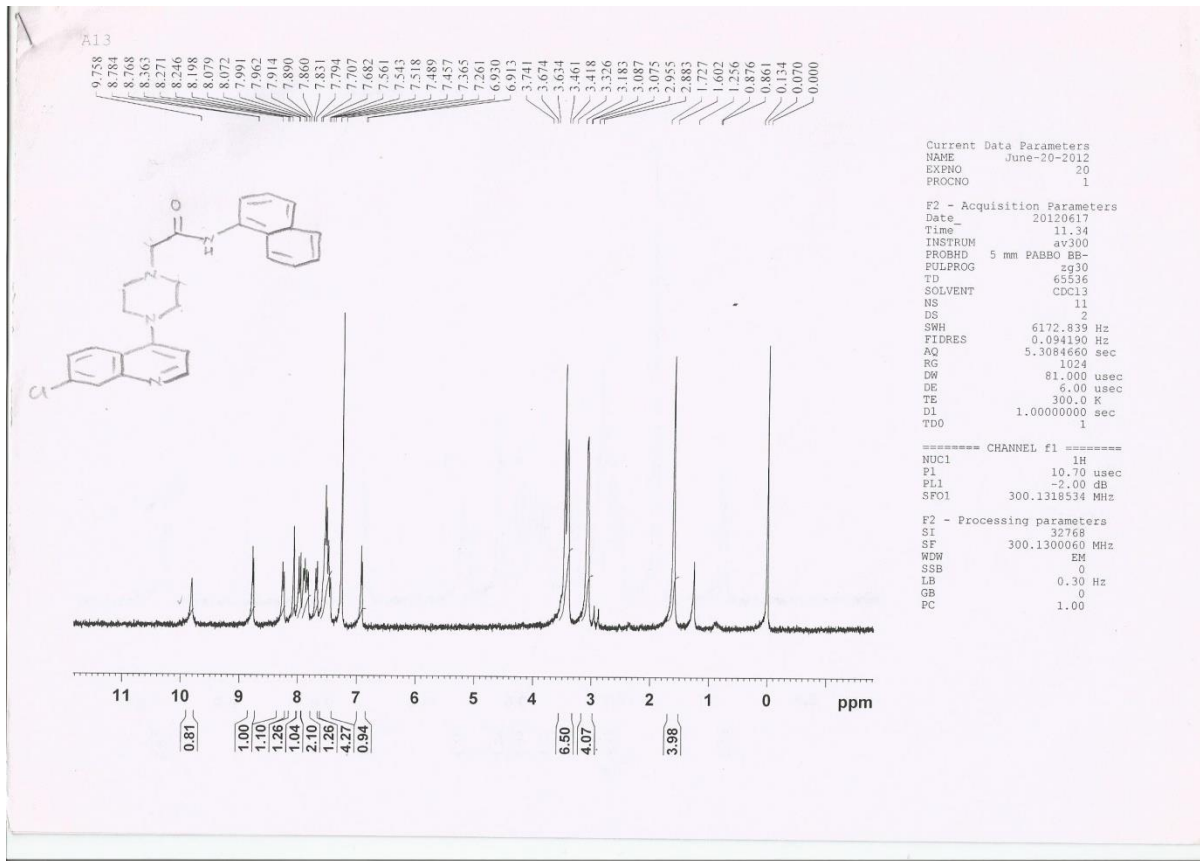

Figure14: <sup>1</sup>H Spectra of the compound A13

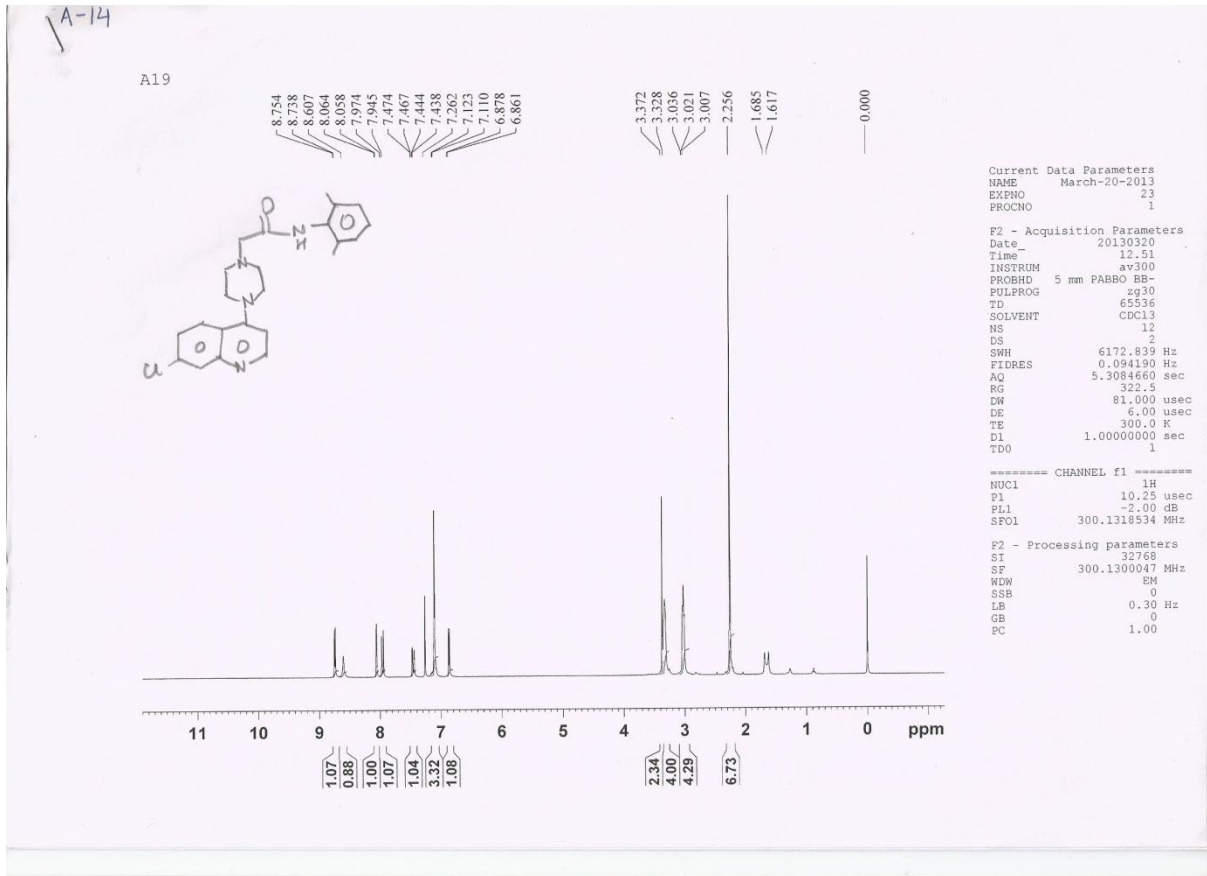

Figure15:  $^1\text{H}$  Spectra of the compound A14

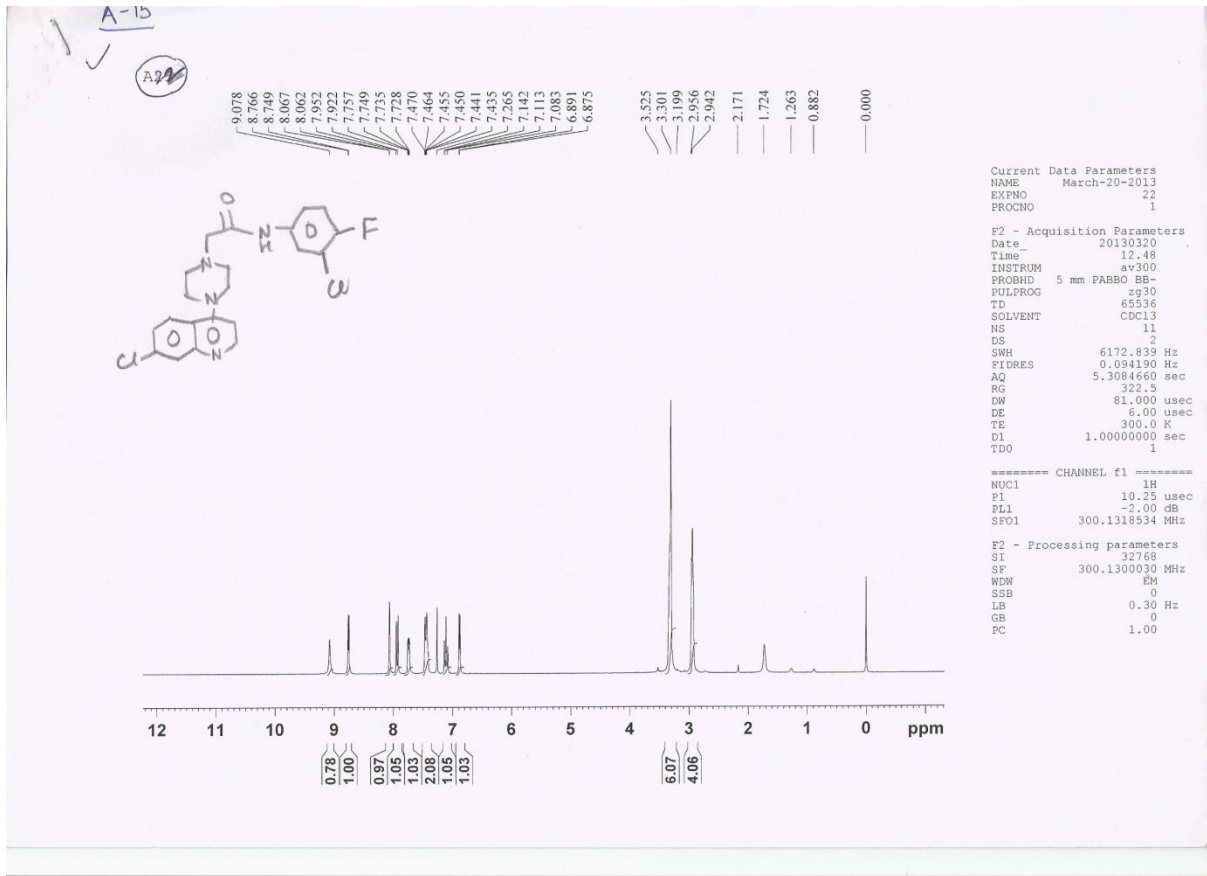

Figure16: <sup>1</sup>H Spectra of the compound A15

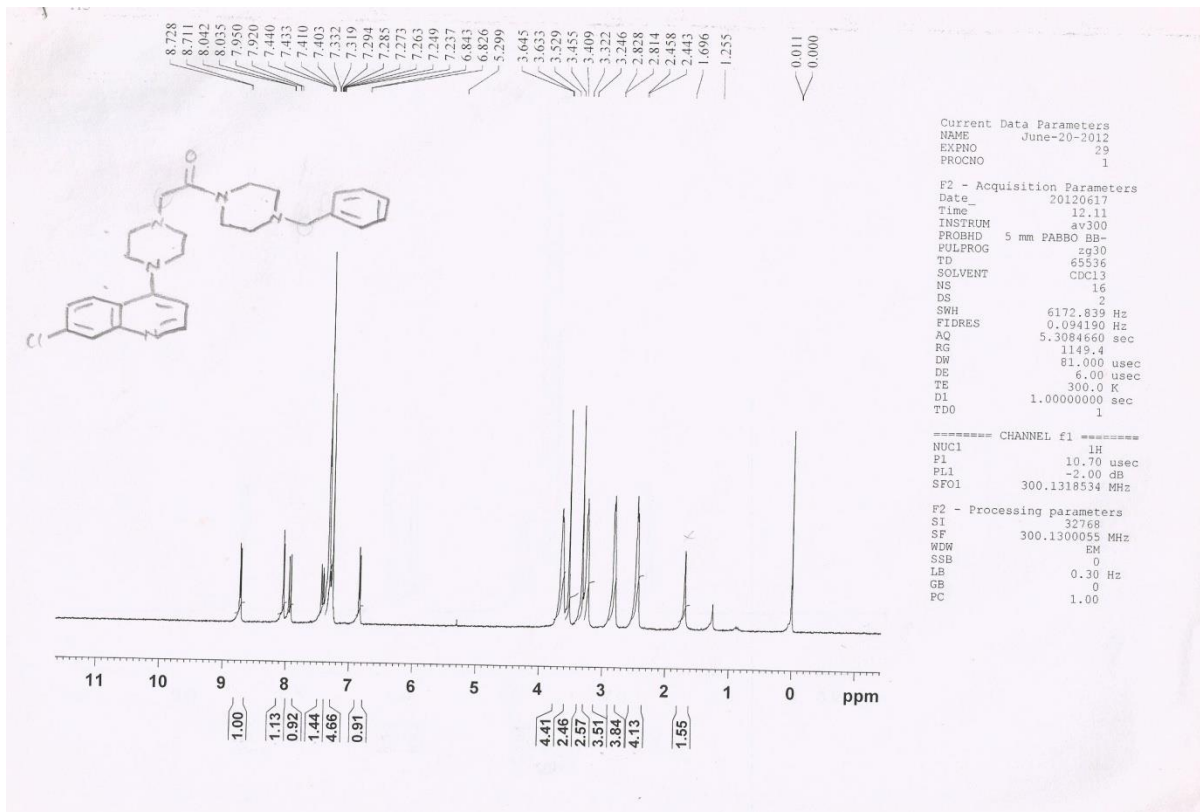

Figure17: <sup>1</sup>H Spectra of the compound A16



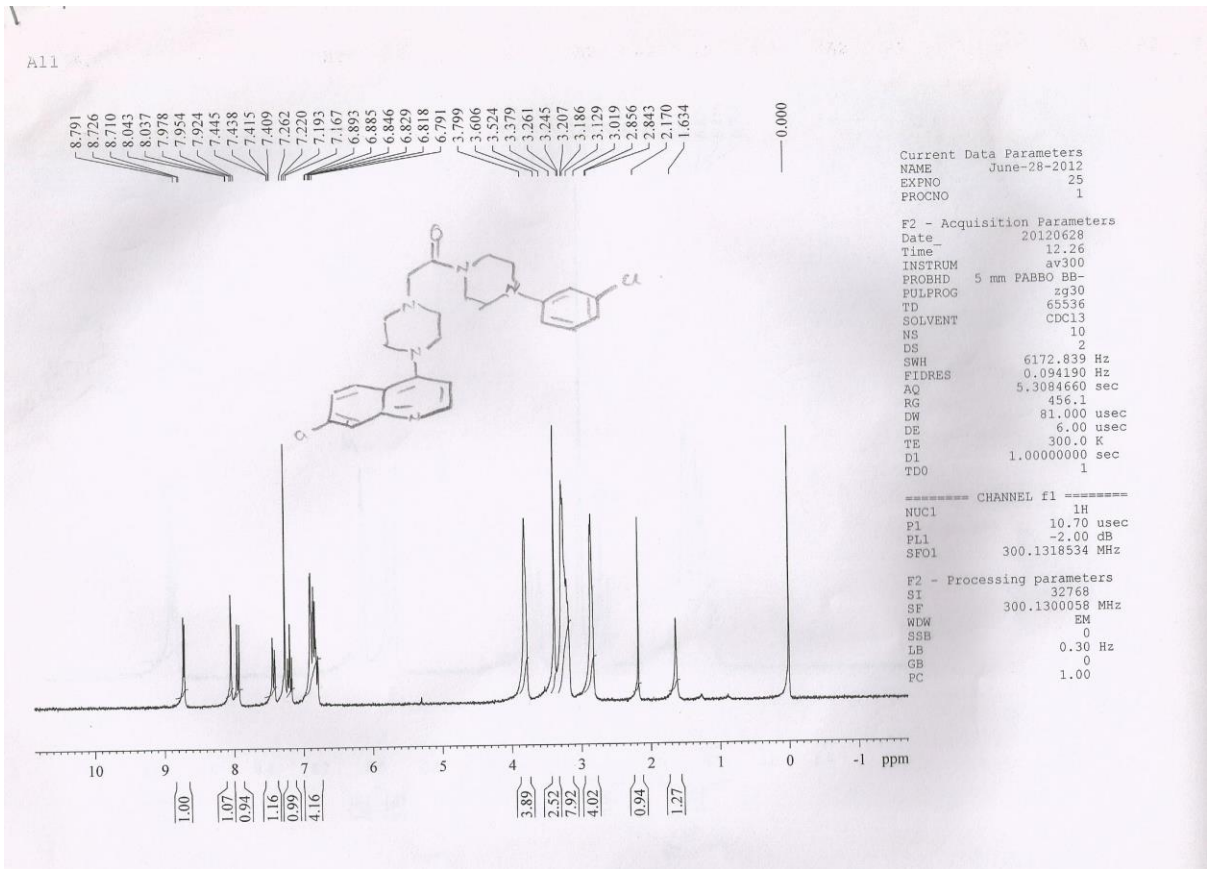

Figure18: <sup>1</sup>H Spectra of the compound A17

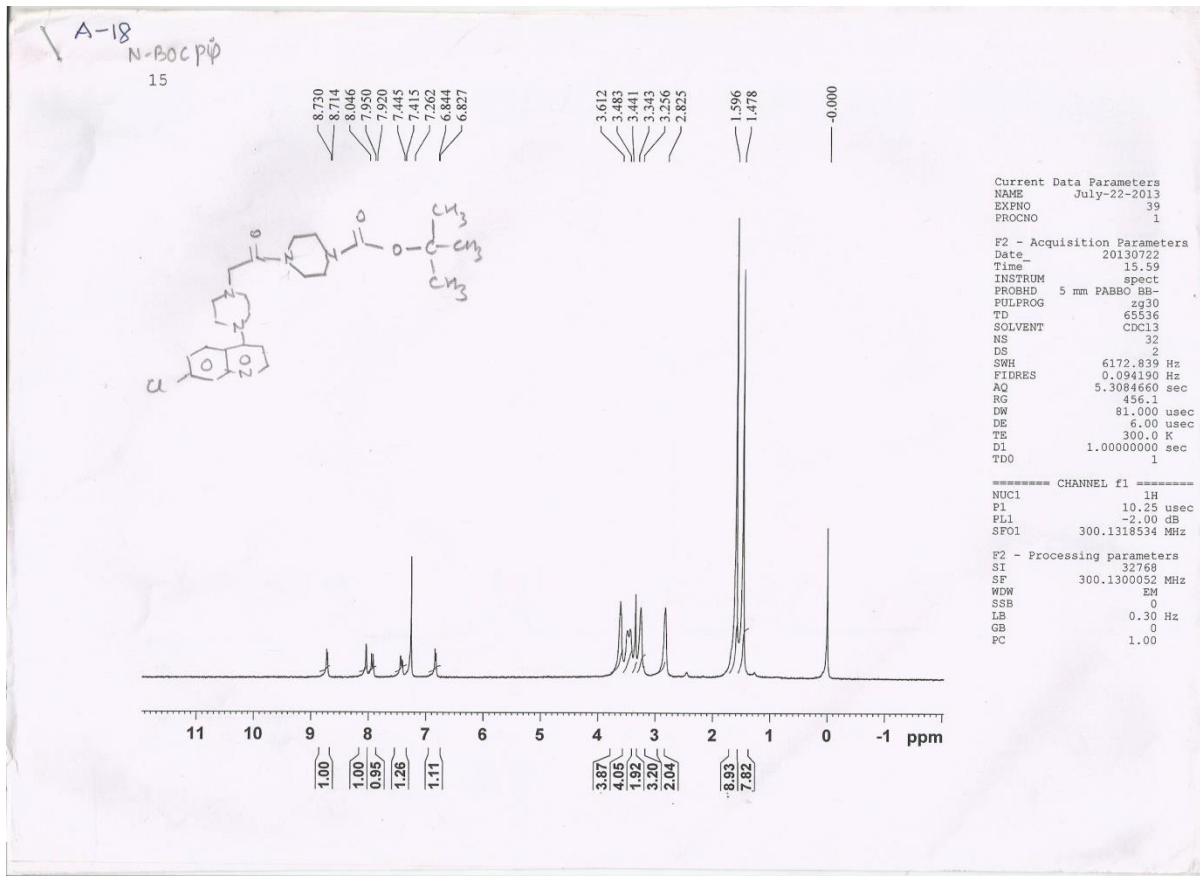

Figure19:  $^1\text{H}$  Spectra of the compound A18

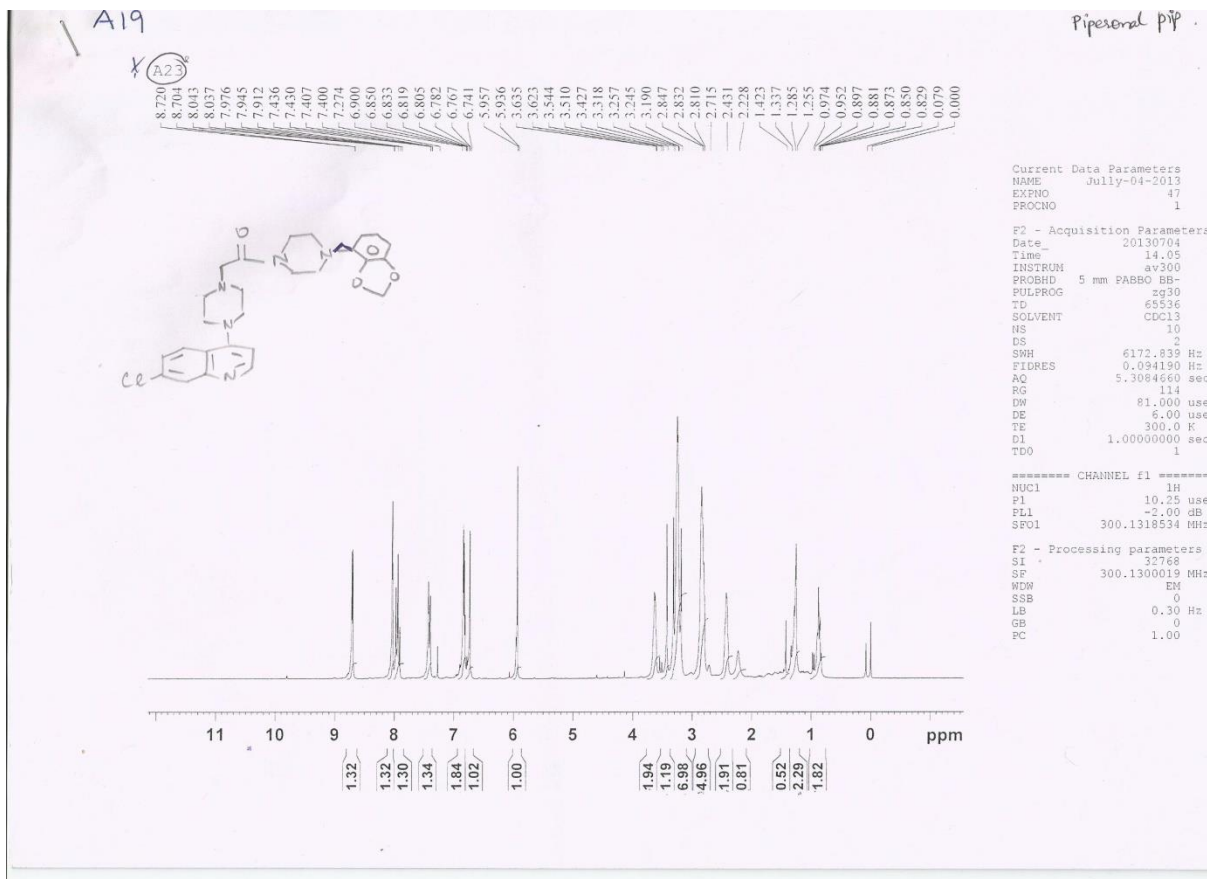

**Figure20: <sup>1</sup>H Spectra of the compound A19**

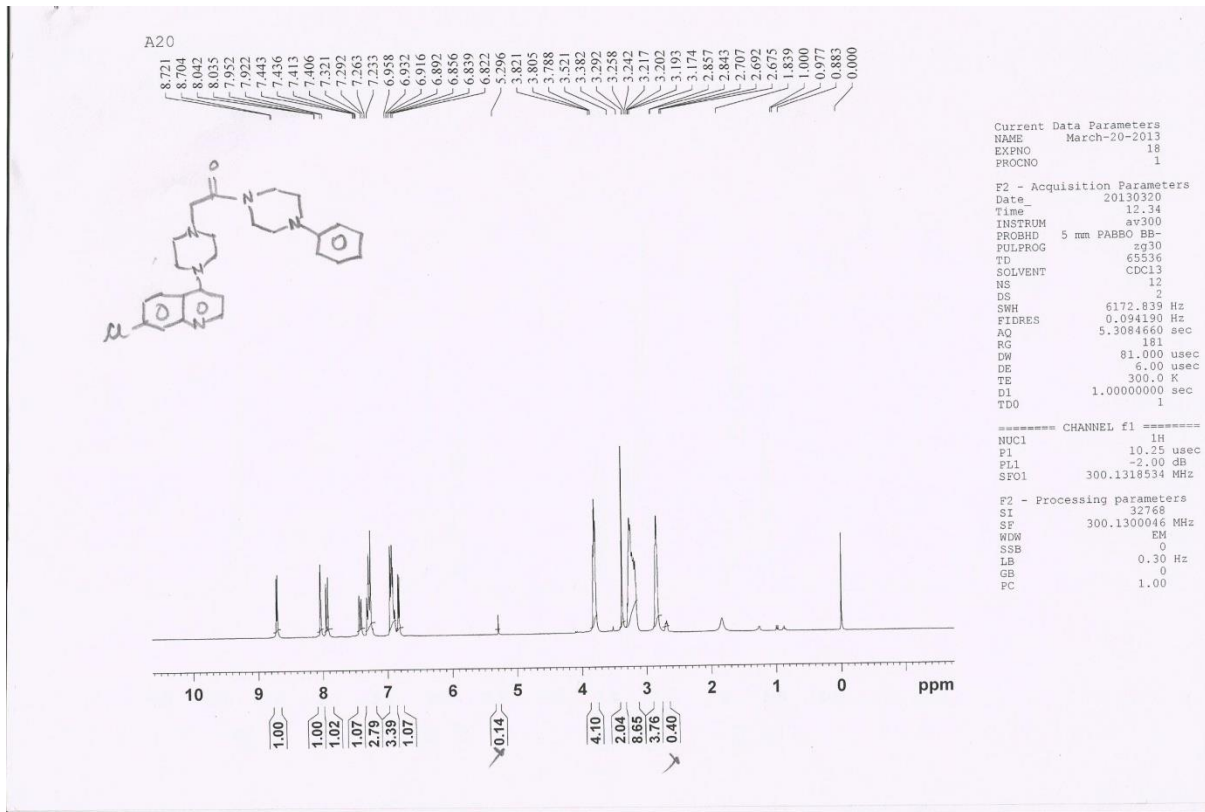

Figure21:  $^1\text{H}$  Spectra of the compound A20

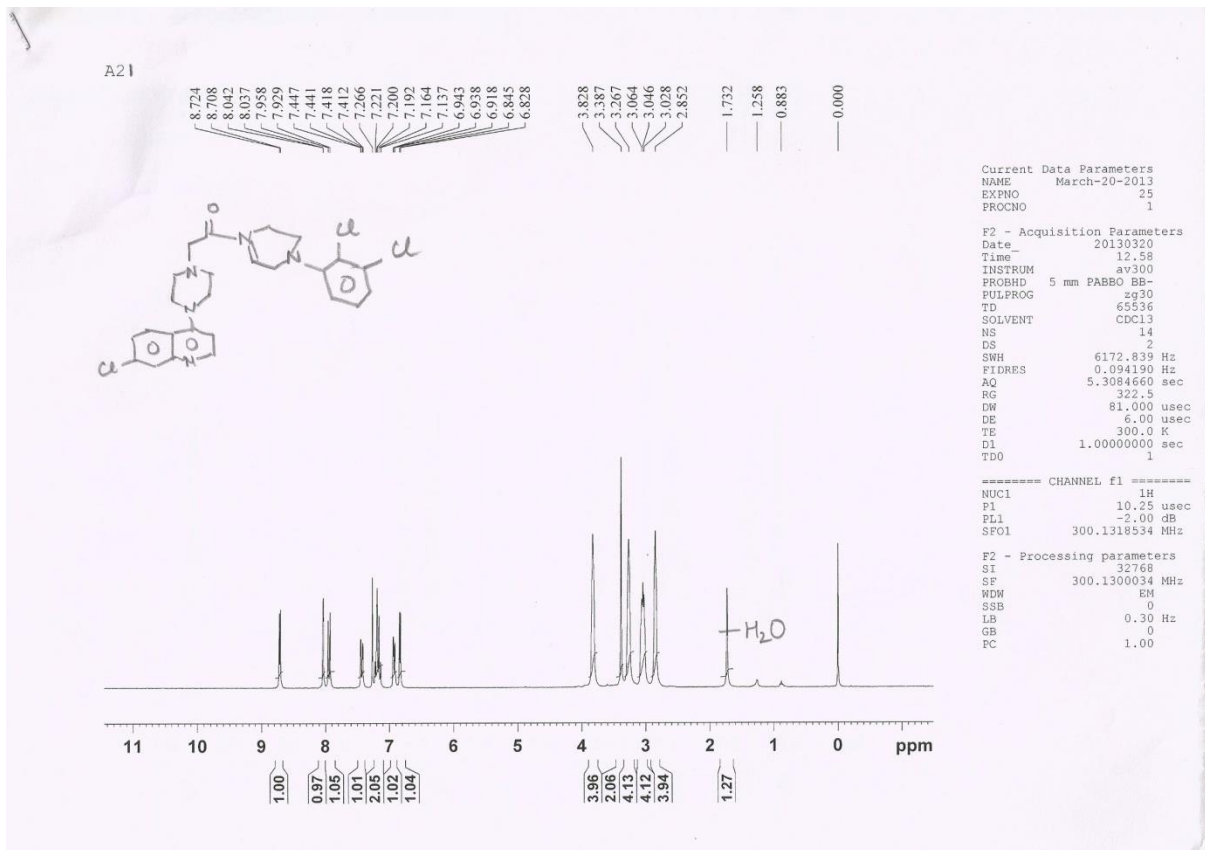

Figure22:  $^1\text{H}$  Spectra of the compound A21

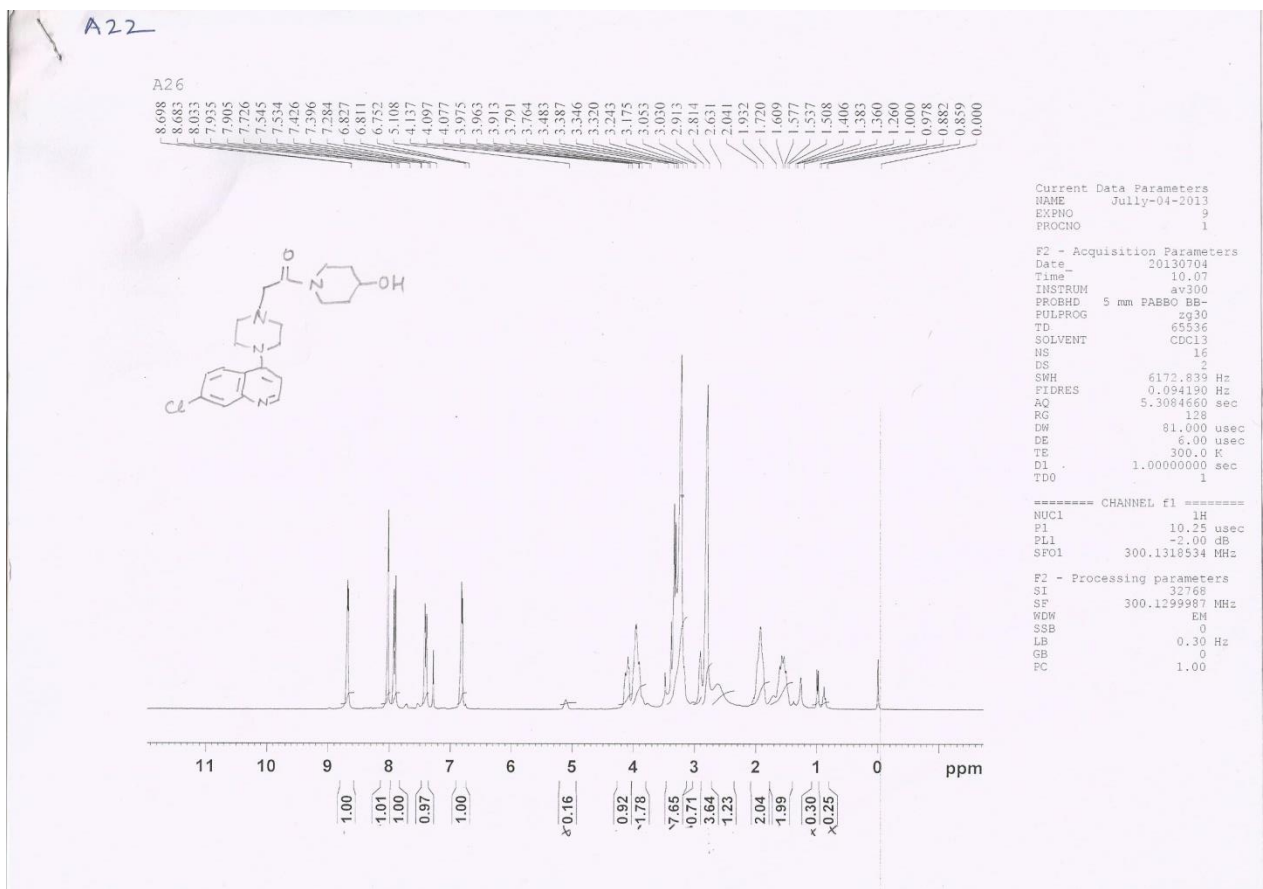

Figure23: <sup>1</sup>H Spectra of the compound A22

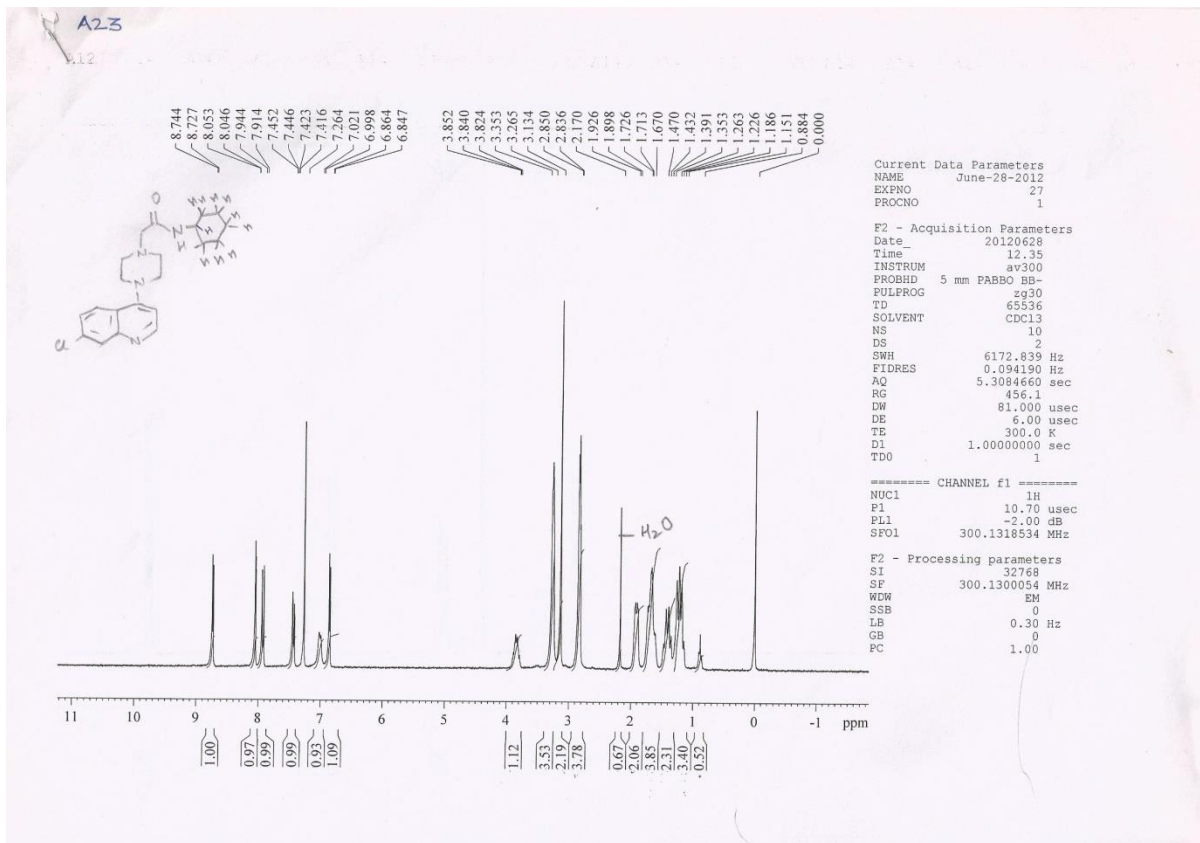

Figure24: <sup>1</sup>H Spectra of the compound A23

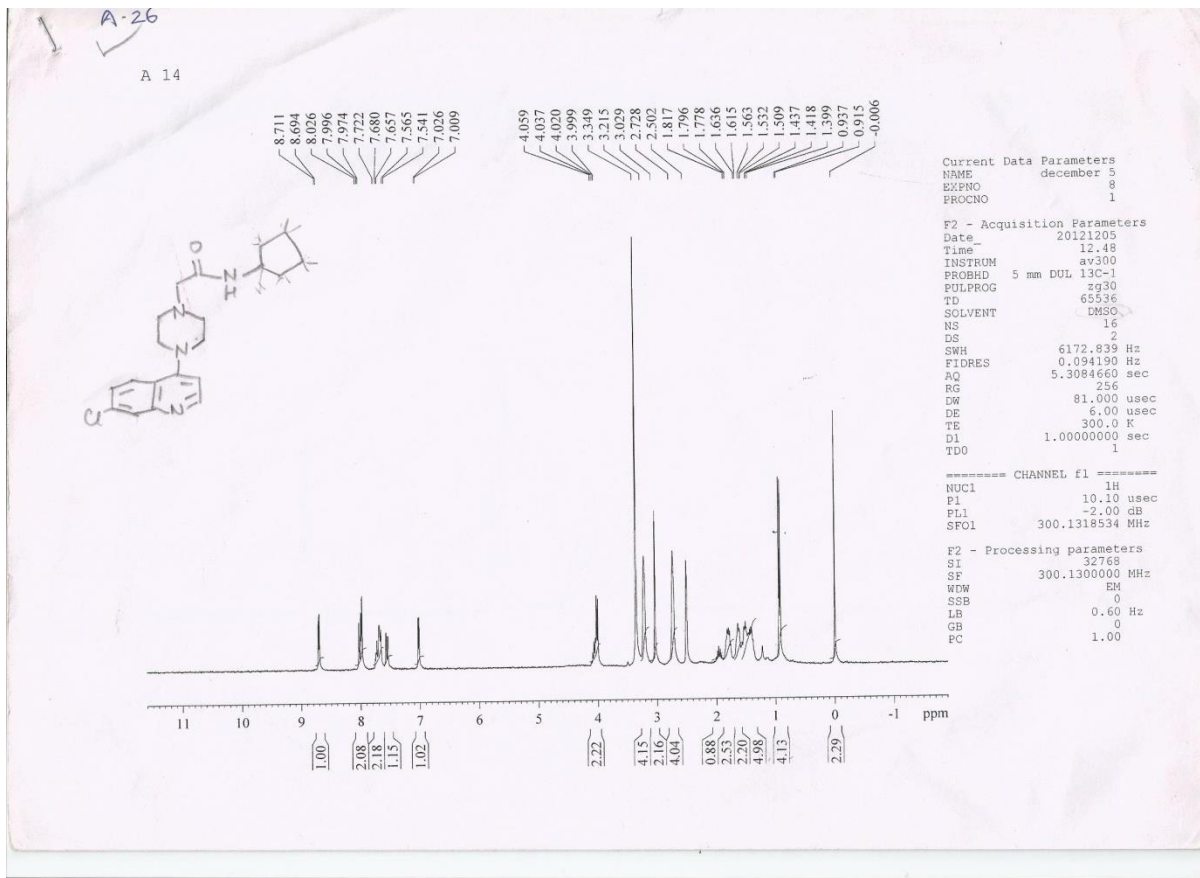

Figure25:  $^1\text{H}$  Spectra of the compound A26



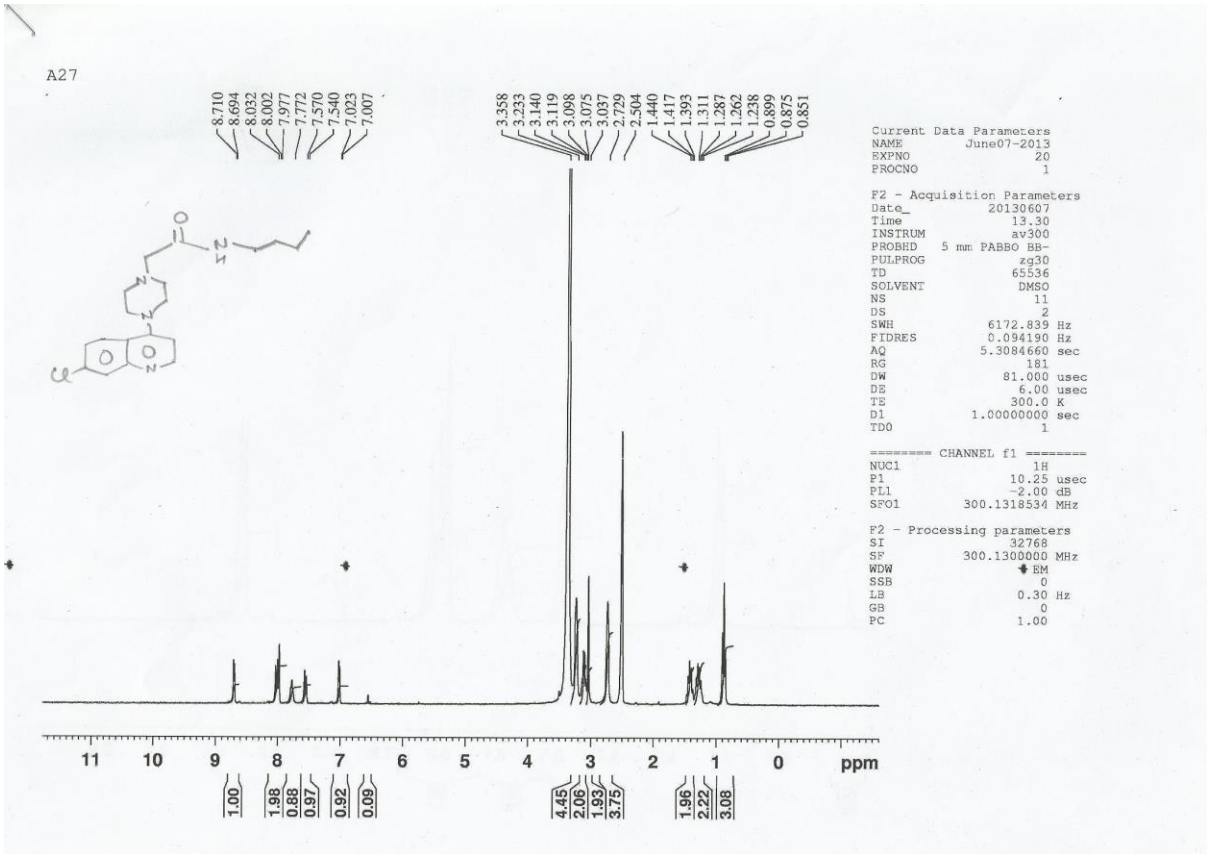

Figure26: <sup>1</sup>H Spectra of the compound A27

## References:

- [24] Z. Xiaohe, Q. Yu, Y. H.S. Xiuqing and Z. Rugang, *Chem Biol Drug Des* 2010; 76, 330-339
- [25] J. Qinggang , D. Yang , X. Wang , C. Chen, Q. Deng , G. Zhiqiang , L. Yuan a , Xiaolan Yang, F. Liao; *Bioorg. Med. Chem.* 2014, 22, 3405–3413
- [26] Gonzalez-Rosende, M. E.; Olivar, T.; Castillo, E.; Sepulveda-Arques, J. *Arch. Pharm.* 2008, 341, 690-695.
- [27] H. Behbehani, and H. M.Ibrahim, *Molecules* 2012, 17, 6362-6385
- [28] R. Kumar, M. Kaur , M. S. Bahia, Om Silakari, *Eur. J. Med. Chem.* 2014, 80, 83-91.
- [29] T. R. K. Reddy , C. Li, X. Guo, P. M. Fischer, L. V. Dekker, *Bioorg. Med. Chem.* 2014, 22, 5378–5391
- [30] Jain NP , Upasani CD , Kalkotwar RS and Jain UN, *Research Journal of Pharmaceutical, Biological and Chemical Sciences*, 2013, 3, 1470-1480.
- [31] Chen Hong , Wen Luo, , Dong Yao, Ya-Bin Su, Xin Zhang, Run-Guo Tian, Chao-Jie Wang *Bioorg. Med. Chem.* 2014, 22 3213–3219
- [32] Mingming Zhang, Weiliang Zhu, Yingxia Li, *Eur. J. Med. Chem.* 2013, 62, 301-310.
- [33] Cunlong Zhang , Chunyan Tan , Xuyu Zu , Xin Zhai , Feng Liu , Bizhu Chu, Xiaohua Ma, Yuzong Chen, Ping Gong, Yuyang Jiang , *Eur. J. Med. Chem.* , 2011, 46, 1404-1414
- [34] Colabufo, Nicola Antonio; Berardi, Francesco; Perrone, Roberto; Rapposelli, Simona; Digiacomo, Maria; Vanni, Michael; Balsamo, Aldo, *J Med Chem.* 2008, 51, 7602-13.
- [35] Stephen J. Shuttleworth, Daniel Nasturica, Christian Gervais, M. Arshad Siddiqui, Robert F. Rando and Nola Lee, *Bioorg Med. Chem. Lett.*, 2000, 10, 2501-2504.

[36] Brown, Dennis A.; Kharkar, Prashant S.; Parrington, Ingrid; Reith, Maarten E. A.; Dutta, Aloke K., *J. Med. Chem.* 2008, 51, 7806–7819

[37] Pablo Wessig and Kristian Möllnitz, *J. Org. Chem.* 2008, 73, 4452–4457.

[38] Wu, Chun-Fang; Zhao, Xin; Lan, Wen-Xian; Cao, Chunyang; Liu, Jin-Tao; Jiang, Xi-Kui; Li, Zhan-Ting, *J. Org. Chem.* 2012, 77, 4261–4270.

[39] Musso, David L.; Cochran, Felicia R.; Kelley, James L.; McLean, Ed W.; Selph, Jeffrey L.; Rigdon, Greg C.; Orr, G. Faye; Davis, Ronda G.; Cooper, Barrett R.; Styles, Virgil L.; Thompson, James B.; Hall, William R., *J. Med. Chem.*, 2003, 46, 3-6.

[40] Christian Jöst, Christoph Nitsche, Therese Scholz, Lionel Roux, and Christian D. Kle J. *Med. Chem.* 2014, 57, 7590–7599
