# Supplementary material for: Chloroquinoline–acetamide hybrids: a promising series of potential antiprotozoal agents
Source: Royal Society of Chemistry journal article supplement (doi:10.1039/c5ra05472a), 2015-01-01
Supplement: c5ra05472a2.pdf [file c5ra05472a2.pdf]

### Supplementary Information

## Chloroquinoline-acetamide hybrids: A promising series of potential antiprotozoal agent

Afreen Inam<sup>a</sup>, Robyn L. Van Zyl<sup>b</sup>, Natasha J. van Vuuren<sup>b</sup>, Chien-Teng Chen<sup>b</sup>, Fernando Avecilla<sup>c</sup>, Subhash M. Agarwal<sup>d</sup>, Amir Azam<sup>a</sup>

**Table-** Bond lengths [Å] and angles [°] for 2-(4-(7-chloroquinolin-4-yl)piperazine-1-yl)-*N*-(4-fluorophenyl)acetamide (**A7**), for 2-(4-(7-chloroquinolin-4-yl)piperazine-1-yl)-*N*-*p*-tolylacetamide (**A8**), for 2-(4-(7-chloroquinolin-4-yl)piperazine-1-yl)-*N*-*o*-tolylacetamide (**A12**) and 2-(4-(7-chloroquinolin-4-yl)piperazine-1-yl)-1-(4-(2,3-dichlorophenyl)pipezin-1-yl)-ethanone (**A21**).

| Bond lengths | <b>A7</b>  | <b>A8</b>  | <b>A12</b> | <b>A21</b> |
|--------------|------------|------------|------------|------------|
| Cl(1)-C(1)   | 1.7373(11) | 1.7404(14) | 1.7380(12) | 1.7369(11) |
| Cl(2)-C(15)  |            |            |            | 1.7257(11) |
| Cl(3)-C(16)  |            |            |            | 1.7337(12) |
| F(1)-C(13)   | 1.3659(14) |            |            |            |
| O(1)-C(9)    | 1.2212(14) | 1.2160(17) | 1.2207(15) | 1.2255(13) |
| N(1)-C(5)    | 1.3994(14) | 1.4006(18) | 1.4090(14) | 1.4054(13) |
| N(1)-C(6)    | 1.4613(14) | 1.4732(18) | 1.4605(15) | 1.4655(13) |
| N(1)-C(21)   |            |            |            | 1.4748(13) |
| N(1)-C(17)   | 1.4751(14) | 1.4589(18) | 1.4696(15) |            |
| N(2)-C(8)    | 1.4539(15) | 1.4636(18) | 1.4564(15) | 1.4585(13) |
| N(2)-C(7)    | 1.4670(15) | 1.4638(18) | 1.4588(16) | 1.4574(14) |

|            |            |            |            |            |
|------------|------------|------------|------------|------------|
| N(2)-C(16) | 1.4674(14) | 1.4702(18) | 1.4625(16) |            |
| N(2)-C(20) |            |            |            | 1.4650(13) |

---

| Angles          | <b>A7</b> | <b>A8</b>  | <b>A12</b> | <b>A21</b> |
|-----------------|-----------|------------|------------|------------|
| C(5)-N(1)-C(6)  | 115.86(9) | 117.11(11) | 115.12(10) | 115.10(8)  |
| C(5)-N(1)-C(21) |           |            |            | 116.43(8)  |
| C(6)-N(1)-C(21) |           |            |            | 109.97(8)  |
| C(5)-N(1)-C(17) | 114.69(9) | 116.95(11) | 114.39(9)  |            |
| C(6)-N(1)-C(17) | 109.46(9) | 110.01(11) | 110.54(9)  |            |
| C(8)-N(2)-C(7)  | 111.16(9) | 110.38(11) | 112.00(10) | 110.73(8)  |
| C(7)-N(2)-C(20) |           |            |            | 109.43(8)  |
| C(8)-N(2)-C(20) |           |            |            | 112.45(9)  |
| C(8)-N(2)-C(16) | 110.26(9) | 110.11(11) | 111.66(10) |            |
| C(7)-N(2)-C(16) | 109.03(9) | 108.47(11) | 109.72(10) |            |

---

**Table** - Hydrogen bonds for the compounds 2-(4-(7-chloroquinolin-4-yl)piperazine-1-yl)-*N*-(4-fluorophenyl)acetamide (**A7**), 2-(4-(7-chloroquinolin-4-yl)piperazine-1-yl)-*N-p*-tolylacetamide (**A8**) and 2-(4-(7-chloroquinolin-4-yl)piperazine-1-yl)-*N-o*-tolylacetamide (**A12**) [Å and °].

**A7**

---

| D-H...A               | d(D-H)   | d(H...A)  | d(D...A)   | <(DHA)    |
|-----------------------|----------|-----------|------------|-----------|
| O(1W)-H(1WA)...N(4)#1 | 0.831(9) | 2.080(10) | 2.8965(13) | 167.5(16) |
| O(1W)-H(1WB)...N(2)   | 0.824(9) | 2.137(9)  | 2.9461(13) | 167.3(15) |
| N(3)-H(3)...O(1W)#2   | 0.86     | 2.03      | 2.8740(13) | 165.1     |

---

Symmetry transformations used to generate equivalent atoms:

#1  $x+1, y+1, z$  #2  $x+1, y, z$

**A8**

---

| D-H...A           | d(D-H)    | d(H...A)  | d(D...A)   | <(DHA)    |
|-------------------|-----------|-----------|------------|-----------|
| N(3)-H(3N)...N(2) | 0.870(18) | 2.248(17) | 2.7186(17) | 113.8(14) |

---

---

**A12**

---

| D-H...A           | d(D-H)    | d(H...A)  | d(D...A)   | <(DHA)    |
|-------------------|-----------|-----------|------------|-----------|
| N(3)-H(3N)...N(2) | 0.815(17) | 2.165(17) | 2.6662(15) | 119.8(14) |

---

**Spectral data of the different substituted chloro acetamides (1-27)**

**2- chloro-N- phenylacetamide (1):** Yield 75%, <sup>1</sup>HNMR (300MHz, CDCl<sub>3</sub>) δ(ppm): 8.227 (bs, 1H), 7.567 (d, 2H, *J*=8.1Hz), 7.396-7.344 (m, 2H), 7.207-7.157 (m, 1H), 4.201 (ss, 2H).

**Methyl 2-(2-chloroacetamido) benzoate (2):** Yield 72%, <sup>1</sup>HNMR (300MHz, CDCl<sub>3</sub>) δ(ppm): 11.906 (bs, 1H), 8.741 (d, 1H, *J*=8.1Hz), 8.105 (d, 1H, *J*=6.6Hz), 7.624-7.574 (m, 1H), 7.205-7.158 (m, 1H), 4.236 (ss, 2H), 1.74 (s, 3H).

**2-chloro-N-(2, 4-difluorophenyl)acetamide (3):** Yield 70%, <sup>1</sup>HNMR (300MHz, CDCl<sub>3</sub>) δ(ppm): 9.359 (bs, 1H), 8.543 (m, 2H), 7.995 (s, 1H), 4.105 (ss, 2H).

**N-(3-acetylphenyl)-2-chloroacetamide (4):** Yield 71%, <sup>1</sup>HNMR (300MHz, CDCl<sub>3</sub>) δ(ppm) : 8.400 ( bs, 1H ) , 8.066 ( s , 1H ) , 7.946 ( d, 1H, *J*=8.1 Hz ) , 7.793 ( d ,1H, *J*=7.8 Hz), 7.521 ( t, 1H, *J*=7.8 Hz), 4.236 ( s, 2H , CH<sub>2</sub>), 2.638 (ss, 3H ,CH<sub>3</sub>).

***N*-(4-acetylphenyl)-2-chloroacetamide (5):** Yield 73%,  $^1\text{H}$ NMR (300MHz,  $\text{CDCl}_3$ )  $\delta$ (ppm) : 8.398 ( bs, 1H ) , 7.996-7.959 ( m , 2H , ) , 7.694 ( d, 2H,  $J=8.7$  Hz) , 4.220 ( ss, 2H) , 2.595 (ss, 3H)

**2-chloro-*N*-(2-fluorophenyl)acetamide (6):** Yield 78%,  $^1\text{H}$ NMR (300MHz,  $\text{CDCl}_3$ )  $\delta$ (ppm): 8.548 ( bs, 1H) , 8.330-8.274( m , 1H) , 7.214-7.125(m , 3H) , 4.240 ( ss ,2H)

**2-chloro-*N*-(4-fluorophenyl)acetamide (7):** Yield 80%,  $^1\text{H}$ NMR (300MHz,  $\text{CDCl}_3$ )  $\delta$ (ppm) : 8.242 (bs, 1H) , 7.558-7.514 ( m , 2H) , 7.109-7.051 (m, 2H) , 4.341( ss,2H)

**2-chloro-*N-p*-tolylacetamide (8):** Yield 82%,  $^1\text{H}$ NMR (300MHz,  $\text{CDCl}_3$ )  $\delta$ (ppm) : 8.190 (bs, 1H) , 7.458 ( d , 2H,  $J=8.4$  Hz) , 7.198 ( d , 2H,  $J=8.4$  Hz), 4.205 (ss, 2H), 2.356 (ss, 3H).

**2-chloro-*N-m*-tolylacetamide (9):** Yield 84%,  $^1\text{H}$ NMR (300MHz,  $\text{CDCl}_3$ )  $\delta$ (ppm): 8.201(bs,1H) , 7.400 (s ,1H) , 7.37 (d , 1H ,  $J=8.1$  Hz) , 7.28-7.24 (m, 1H), 7.02 (d , 1H ,  $J=7.2$ Hz) , 4.20 (ss ,2H), 2.38 (ss ,3H)

**2-chloro-*N*-(3-chlorophenyl)acetamide (10):** Yield 77%,  $^1\text{H}$ NMR (300MHz,  $\text{CDCl}_3$ )  $\delta$ (ppm): 8.275 (bs, 1H), 7.702 (bs, 1H), 7.440 (d, 1H,  $J=6.9$ Hz), 7.348-7.281 (m, 1H), 7.199-7.170 (m, 1H), 4.210 (ss, 2H).

**2-chloro-*N*-(4-bromophenyl)acetamide (11):** Yield 65%,  $^1\text{H}$ NMR (300MHz,  $\text{CDCl}_3$ )  $\delta$ (ppm) : 9.278 (bs, 1H), 6.910-6.881 (m, 2H), 6.768 (d, 2H,  $J=8.4$ Hz), 3.486 (ss, 2H).

**2-chloro-*N-o*-tolylacetamide (12):** Yield 79%,  $^1\text{H}$ NMR (300MHz,  $\text{CDCl}_3$ )  $\delta$ (ppm): 8.262 (bs, 1H), 7.904 (d, 1H,  $J=7.8$ Hz), 7.284-7.323 (m, 2H), 7.146 (d, 1H,  $J=7.2$ Hz), 4.288 (ss, 2H), 3.327 (ss, 3H).

**2-chloro-N-(naphthalene-1-yl)acetamide (13):** Yield 76%, <sup>1</sup>HNMR (300MHz, CDCl<sub>3</sub>) δ(ppm): 8.800 (bs, 1H), 8.021 (d, 1H, *J*=7.5Hz), 7.932 (t, 2H, *J*=8.1Hz), 7.795 (d, 1H, *J*=8.1Hz), 7.631-7.54 (m, 3H), 4.371 (ss, 2H).

**2-chloro-N-(2,6-dimethylphenyl)acetamide (14) :** Yield 79%, <sup>1</sup>HNMR (300MHz, CDCl<sub>3</sub>) δ(ppm): 7.875 (bs, 1H), 7.199-7.118 (m, 3H), 4.281 (ss, 2H), 2.269 (ss, 6H).

**2-chloro-N-(3-chloro,4-fluorophenyl)acetamide (15):** Yield 72%, <sup>1</sup>HNMR (300MHz, CDCl<sub>3</sub>) δ(ppm): 8.249 (bs, 1H), 7.771-7.742 (m, 1H), 7.432-7.372 (m, 1H), 7.283 (s, 1H), 4.214 (m, 2H).

**1-(4-benzylpiperazin-1-yl)-2-chloroethanone (16):** Yield 55%, <sup>1</sup>HNMR (300MHz, CDCl<sub>3</sub>) δ(ppm): 7.289-7.150 (m, 2H), 7.090-6.991 (m, 3H), 4.012 (ss, 2H), 3.994-3.850 (m, 4H), 3.830 (ss, 2H), 3.654-3.590 (m, 4H).

**2-chloro-1-(4-(3-chlorophenyl)piperazin-1-yl)ethanone (17):** Yield 42%, <sup>1</sup>HNMR (300MHz, CDCl<sub>3</sub>) δ(ppm): 7.190 (s, 1H), 7.154 (t, 1H, *J*=8.1Hz), 6.821 (d, 1H, *J*= 8.4Hz), 6.750 (d, 1H, *J*= 7.8Hz), 4.041 (ss, 2H), 3.795-3.661 (m, 4H), 3.170-3.125 (m, 4H).

**1-(4-tert-butylpiperazin-1-yl)-2-chloroethanone (18):** Yield 69%, <sup>1</sup>HNMR (300MHz, CDCl<sub>3</sub>) δ(ppm): 4.022 (ss, 2H), 3.522-3.430 (m, 4H), 3.395-3.310 (m, 4H), 1.400 (ss, 9H).

**1-(4-(benzo[1,3]dioxol-5-ylmethyl)piperazine-1-yl)-2-chloroethanone (19):** Yield 52%, <sup>1</sup>HNMR (300MHz, CDCl<sub>3</sub>) δ(ppm): 6.861 (s, 1H), 6.750 (bs, 2H), 5.957 (ss, 2H), 4.069 (ss, 2H), 3.642 (bs, 2H), 3.526 (bs, 2H), 3.455 (bs, 2H), 2.470-2.453 (m, 4H).

**2-chloro-1-(4-phenylpiperazin-1-yl)ethanone (20):** Yield 55%, <sup>1</sup>HNMR (300MHz, CDCl<sub>3</sub>) δ(ppm): 7.950-7.824 (m, 2H), 7.431-7.330 (m, 2H), 6.981 (m, 1H), 4.021 (ss, 2H), 3.951-3.820 (m, 4H), 3.350-3.249 (m, 4H).

**2-chloro-1-(4-(2,3-dichlorophenyl)piperazine-1-yl)ethanone (21):** Yield 55%, <sup>1</sup>HNMR (300MHz, CDCl<sub>3</sub>) δ(ppm): 7.281-7.137 (m, 2H), 6.956-6.932 (m, 1H), 4.125 (ss, 2H), 3.824-3.811 (m, 2H), 3.723-3.710 (m, 2H), 3.106-3.038 (m, 4H)

**2-chloro-N-(4-hydroxypiperidin-1-yl)acetamide (22):** Yield 55%, <sup>1</sup>HNMR (300MHz, CDCl<sub>3</sub>) δ(ppm): 5.248 (bs, 1H), 5.148-5.116 (m, 1H), 4.112-4.011 (m, 4H), 3.832-3.720 (m, 2H), 2.016-1.775 (m, 4H).

**2-chloro-N-cyclohexylacetamide (23):** Yield 82%, <sup>1</sup>HNMR (300MHz, CDCl<sub>3</sub>) δ(ppm): 6.450 (bs, 1H), 4.041 (ss, 2H), 3.861-3.750 (m, 1H), 1.969-1.922 (m, 2H), 1.780-1.626 (m, 4H), 1.470-1.342 (m, 2H), 1.288-1.150 (m, 2H).

**2-chloro-N-isopropylacetamide (24):** Yield 75%, <sup>1</sup>HNMR (300MHz, CDCl<sub>3</sub>) δ(ppm): 6.419 (bs, 1H), 4.289-4.093 (m, 1H), 4.031 (s, 2H), 1.223 (ss, 6H).

**2-chloro-N-cyclopropylacetamide (25):** Yield 70%, <sup>1</sup>HNMR (300MHz, CDCl<sub>3</sub>) δ(ppm): 12.078 (bs, 1H), 3.618 (s, 2H), 1.870-1.654 (m, 1H), 1.453-1.404 (m, 4H).

**2-chloro-N-cyclopentylacetamide (26):** Yield 78%, <sup>1</sup>HNMR (300MHz, CDCl<sub>3</sub>) δ(ppm): 6.520 (bs, 1H), 4.271-4.170 (m, 1H), 4.012 (ss, 2H), 2.030-1.971 (m, 2H), 1.730-1.569 (m, 4H), 1.469-1.400 (m, 2H).

**N-butyl-2-chloroacetamide (27):** Yield 74%, <sup>1</sup>HNMR (300MHz, CDCl<sub>3</sub>) δ(ppm): 7.354 (bs, 1H), 3.452-3.349 (m, 2H), 3.190 (ss, 2H), 2.145-2.059 (m, 2H), 2.045-1.990 (m, 2H), 1.210-1.115 (m, 3H).
